# Supplementary material
Source: PubMed Central journal article supplement (PMC8439610)
Supplement: jci-131-144847-s018.pdf [file jci-131-144847-s018.pdf]

## Supplemental data

### Table of contents

#### Supplemental Methods online only

Treatment, follow-up strategies, and disease outcome  
DNA and RNA sequencing  
Variant detection  
Structural variation detection  
Fusion gene mutation analysis  
Thyroid differentiation score and ERK score  
Real-time quantitative polymerase-chain reaction

#### Supplemental Figures online only

Supplemental Figure 1. Schematic representation of the *VCL-RET* and *RBMS3-ALK* fusions  
Supplemental Figure 2. A 9-year-old boy with an *ERC1-RET* fusion resulting in progressively decreased uptake of radioactive iodine during repeated high-dose <sup>131</sup>I therapy  
Supplemental Figure 3. Transcriptome data from 12 pediatric and 125 adult PTCs  
Supplemental Figure 4. *In vitro* effects of larotrectinib on radioiodine uptake capacity and cell growth  
Supplemental Figure 5. The human TPR-NTRK1 expression vector map  
Supplemental Figure 6. Relative expression by real-time PCR (qPCR) of *NTRK1* genes among Nthy<sup>WT</sup> cells, normal thyroid tissue, Nthy<sup>TPR-NTRK</sup> cells, and thyroid cancer tissue with a *TPR-NTRK* fusion

#### Supplemental Tables online only

Supplemental Table 1. Genetic analysis performed in available tumor tissue of 106 patients  
Supplemental Table 2. Genetic alterations according to age at diagnosis  
Supplemental Table 3. Breakpoint of fusion gene mutations identified from 28 patients  
Supplemental Table 4. Genetic alterations of pediatric PTC patients based on previous studies  
Supplemental Table 5. Clinicopathologic presentation and disease outcome in pediatric PTCs harboring *BRAF*<sup>V600E</sup>  
Supplemental Table 6. Comparison between pediatric and adult patients at SNUH harboring a fusion oncogene (*TRK*, *RET*, or *ALK*) and *BRAF*<sup>V600E</sup>  
Supplemental Table 7. Comparison between pediatric and adult patients in the TCGA database harboring a fusion oncogene (*TRK*, *RET*, or *ALK*) and *BRAF*<sup>V600E</sup>  
Supplemental Table 8. Nucleotide sequences of primers  
Supplemental Table 9. Target gene lists of SNUH FIRST cancer panel (version 3)

#### Supplemental References online only

## Supplemental Methods

### Treatment, and follow-up strategies

As reported previously (1), all patients underwent total thyroidectomy (TT), subtotal thyroidectomy, or lobectomy with or without node dissection. Prophylactic central node dissection was introduced at Seoul National University Hospital (SNUH) in 2003 and has been performed in most patients with PTC  $\geq 1$  cm since 2007. The presence of lung metastasis was evaluated by radiological examinations ( $^{131}\text{I}$  whole-body scans [WBSs] and/or chest computed tomography [CT]). Postoperative  $^{131}\text{I}$  therapy was provided for patients harboring tumors  $> 1$  cm or locoregional and/or lung metastasis. The timing and number of the  $^{131}\text{I}$  doses administered were individualized. After completing the initial therapy, patients were followed up with a clinical examination, measurements of serum thyroglobulin and anti-thyroglobulin antibody levels, and neck ultrasonography.  $^{131}\text{I}$  WBS, CT, and positron emission tomography were performed if indicated.

### Disease outcomes

Disease outcomes were categorized as no evidence of disease (NED), biochemical disease (BCD), and structural disease (SD, persistent or recurrent) based on the follow-up findings (2). NED was defined as the absence of structural abnormalities on imaging and an undetectable serum thyroglobulin level (suppressed or stimulated) for 12 months or longer until the last follow-up. BCD was defined as a detectable, suppressed, or stimulated thyroglobulin level in the absence of structural abnormalities on imaging. SD was defined as the presence of structural abnormalities. Stable and progressive disease was defined according to the Response Evaluation Criteria in Solid Tumors (RECIST) criteria (3).

### DNA and RNA sequencing

Targeted sequencing of cancer-related genes was performed using the FRIST pancancer panel v3 developed at SNUH; this panel includes all exons and some introns of 188 and 71 genes, respectively, known to be important in tumorigenesis (4). All sequencing libraries were sequenced on the Illumina HiSeq platform as paired-end reads. The sequencing reads were aligned to the reference human genome (hg19) using the Burrows–Wheeler aligner (5) and the STAR aligner (6) for DNA and RNA, respectively. WGS and target sequencing followed the Genome Analysis Toolkit (GATK) best practices pipeline until the bam file was created using SAMtools (7), Picard (<http://broadinstitute.github.io/picard/>), and GATK (8). The average coverage for WGS was 34–50 $\times$  for blood DNA and 75 $\times$  for tumor DNA.

### Variant detection

Somatic SNVs and short indels were detected by WGS and targeted sequencing using paired calls implemented in GATK MuTect2, annotated using ANNOVAR (9), and selected via several stages of in-house filters that consider the variant allele count and frequency, the possibility of an oxoG error (10) or strand bias, and the frequency in a normal population, such as the 1,000 Genomes Project (<http://www.1000genomes.org>), Exome Aggregation Consortium (ExAC) (<http://exac.broadinstitute.org/>), and NLHBI Exome Sequencing Project (ESP) (<http://evs.gs.washington.edu/EVS/>).

### Structural variation detection

To detect the somatic copy number alteration (CNA) in the WGS data, the R package HMMcopy was used to count the number of reads with a fixed window size of 1,000 and to normalize the counts considering the GC content and average mappability of each bin. The log2 ratio was obtained from the normalized counts of tumor tissue and blood and was segmented using the R package DNACopy. The targeted sequencing data were analyzed for CNA and SV according to the unique analysis pipeline at SNUH.

### Fusion gene mutation analysis

Gene fusion was screened using STAR fusion, followed by manual review of chimeric reads using the Integrative Genomics Viewer (11), and the final call was determined by confirming the expression of the genes involved in fusion.

### Fluorescence in situ hybridization (FISH) and immunohistochemistry (IHC)

*NTRK* and *RET* rearrangements were examined by FISH using a break apart probes for the *NTRK1* and *RET* loci (ZytoVision, Bremerhaven, Germany) and *NTRK3* loci (Abnova, Taipei, Taiwan). (12, 13) IHC was performed using a BRAF V600E mutation-specific antibody (Ventana Medical Systems, Inc., Tucson, AZ, USA), an NRAS Q61R antibody (Bio SB, Santa Barbara, CA, USA), a monoclonal mouse anti-human ALK antibody (Novocastra,

Newcastle Upon Tyne, UK), and a monoclonal rabbit anti-human pan-Trk antibody (Cell Signaling Technology, Danvers, MA, USA).(14, 15)

### **Thyroid differentiation score**

For the Ensembl gene set, the HTSeq-Count was used to count the number of reads mapped to each gene, and these counts were subsequently converted to RPKM and log2 values, respectively. The median-centered log2 values were applied to display the heatmap and to obtain the thyroid differentiation score (TDS) and ERK score according to previous studies (16, 17)

### **Real-time quantitative polymerase-chain reaction**

RNA from cell lines or fresh frozen tissues was extracted using the RNeasy Mini kit (Qiagen, Hilden, Germany) or Trizol (Life Technologies, Carlsbad, USA). RNA was assessed for quality and concentration using the 2100 Bioanalyzer (Agilent Technologies Inc., Palo Alto, CA). To confirm mRNA expression of NTRK1, 1,000 ng RNA was reverse-transcribed into cDNA using the PrimeScript™ First-strand cDNA Synthesis Kit (TaKaRa Bio Inc., Seoul, Korea). Reverse-transcribed cDNAs were quantified using TB Green Premix Ex Taq™ II (Tli RNaseH Plus, TaKaRa Bio). The levels of overexpression in Nthy<sup>TPR-NTRK</sup> cells were similar to those in NTRK fusion cancer when we compared the NTRK mRNA levels among Nthy<sup>WT</sup>, normal thyroid tissue, Nthy<sup>TPR-NTRK</sup> cells, and thyroid cancer tissue harboring *TPR-NTRK* fusion.

**Supplemental Figure 1.** Schematic representation of the VCL-RET and RBMS3-ALK fusions. Several fusions were identified in the COSMIC database among the tumors of 24 children with fusion oncogenes investigated by targeted or RNA sequencing, including *ETV6-NTRK3*, *TPM3-NTRK1*, *CCDC6-RET*, *NCOA4-RET*, *RET-NCOA4*, *TRIM24-RET*, *ERC1-RET*, *KTN1-RET*, *EML4-ALK* and *STRN-ALK*. We also confirmed *TPR-NTRK1* and *ANK3-RET* fusion in previously published reports (3, 18). However, to our knowledge, *VCL-RET* and *RBMS3-ALK* fusions have not previously been reported in thyroid cancer. Confirming chimeric reads by manual review allowed for identification of fusion breakpoints. (A) Schematic representation of the fusion of genes *VCL* and *RET* by duplication: in-frame fusion between chromosome 10 containing exons 1 to 18 of *VCL* and exons 12 to 19 of *RET*. (B) Schematic representation of the fusion of genes *RBMS3* and *ALK* by translocation: in-frame fusion between *ALK* exon20 and *RBMS3* exon3.

The diagram illustrates the formation of the RET-VCL fusion gene. At the top, a genomic map of chromosome 10 (chr10) is shown, with a red box highlighting the RET gene and a blue box highlighting the VCL gene. Below this, a red dashed box indicates the fusion event, resulting in a chimeric gene structure. The bottom part shows the exon-intron structure of the RET and VCL genes. RET has Exon12 (yellow) and VCL has Exon18 (blue). The fusion gene structure shows Exon18 (blue) followed by Exon12 (yellow), labeled as VCL-RET.

chr2

chr3

ALK

RBMS3

Exon20

Exon3

Exon20

Exon3

RBMS3 - ALK

**Supplemental Figure 2.** A 9-year-old boy (P11) with an *ERCI-RET* fusion resulting in progressively decreased uptake of radioactive iodine during repeated high-dose  $^{131}\text{I}$  therapy. All images are anterior-view images obtained at 2 days after  $^{131}\text{I}$  administration.

At 2 months after surgery (1<sup>st</sup>)  
(70 mCi)

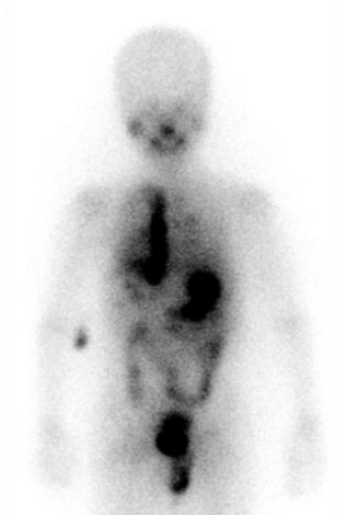

At 8 months (2<sup>nd</sup>)  
(70 mCi)

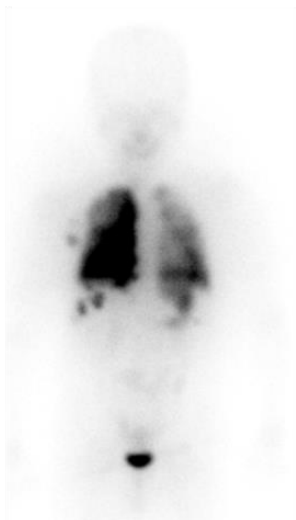

At 14 months (3<sup>rd</sup>)  
(120 mCi)

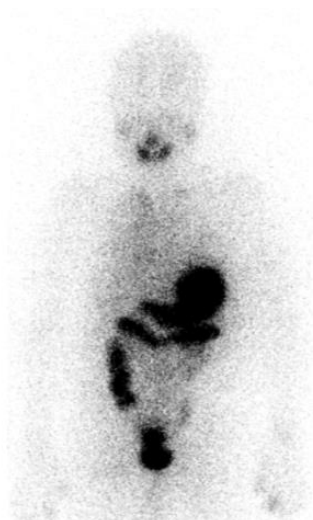

At 22 months (4<sup>th</sup>)  
(120 mCi)

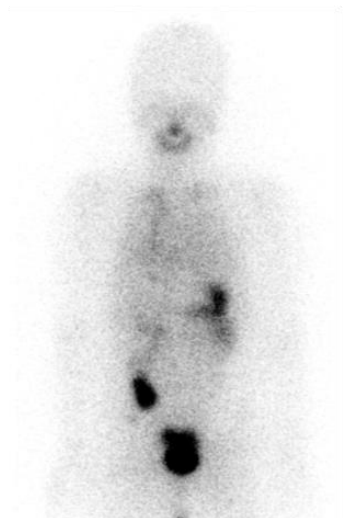

At 31 months (5<sup>th</sup>)  
(140 mCi)

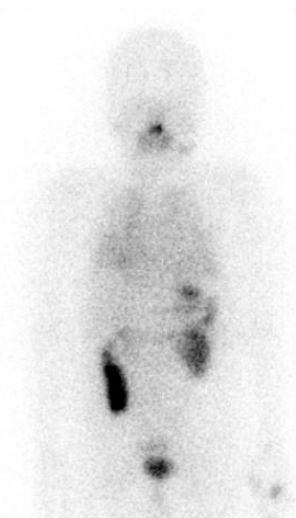

**Supplemental Figure 3.** Transcriptome data from 12 pediatric and 125 adult PTCs. The data was included in patient age, histological subtype, molecular subtype, TDS score, ERK score, the expression profile of 16 TDS genes and 52 MARK signaling pathway genes.

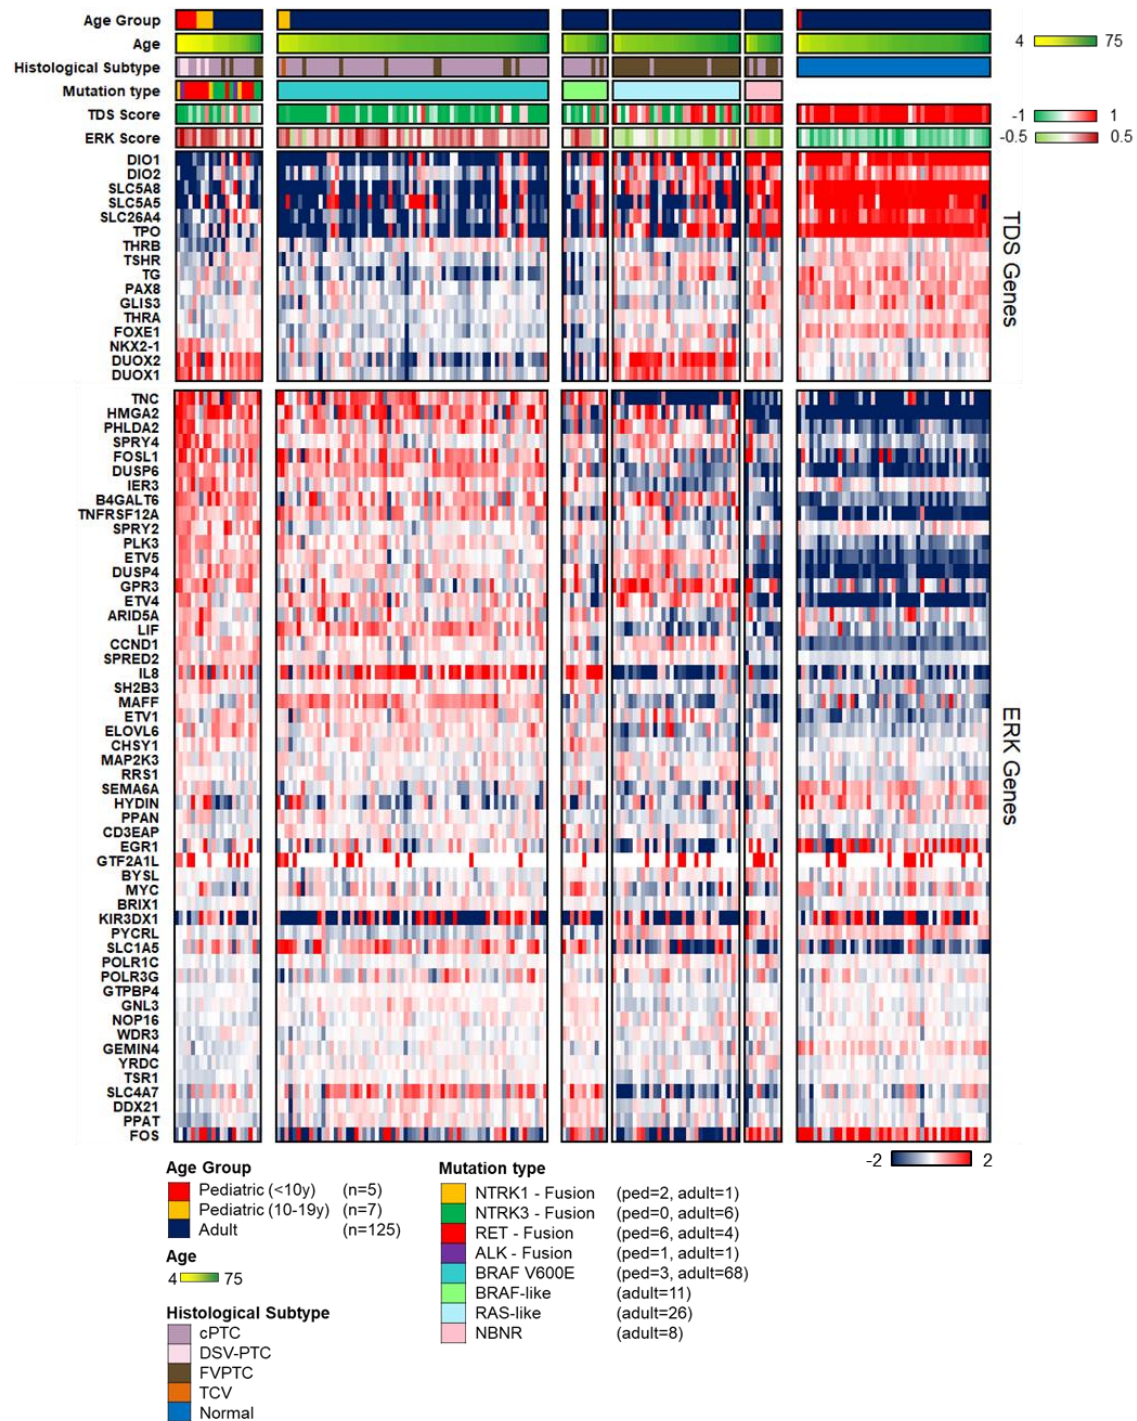

**Supplemental Figure 4.** *In vitro* effects of larotrectinib on radioiodine uptake capacity and cell growth. (A and B)  $^{125}\text{I}$  uptake at baseline and after larotrectinib treatment (10, 50, and 100  $\mu\text{M}$ ) in Nthy<sup>WT</sup> (A) and Nthy<sup>TPR-NTRK</sup> cells (B). (C)  $^{125}\text{I}$  uptake in Nthy<sup>WT</sup> cells at baseline and after treatment with larotrectinib (50  $\mu\text{M}$ ) and larotrectinib (50  $\mu\text{M}$ ) +  $\text{KClO}_4$ . (D) Western blots of NIS (fully glycosylated) in Nthy<sup>WT</sup> and Nthy<sup>TPR-NTRK</sup> cells at baseline, and after larotrectinib treatment (50, 75, and 100  $\mu\text{M}$ ). Figure 4C included western blots of NIS at baseline, and after larotrectinib treatment (50  $\mu\text{M}$  only). (E) The colony-forming ability of Nthy<sup>TPR-NTRK</sup> cells at baseline, and after  $^{131}\text{I}$  therapy alone (100  $\mu\text{Ci}$ ), larotrectinib treatment alone (10, 25, 50, 75, and 100  $\mu\text{M}$ ), and a combination of both therapies. LAR, larotrectinib; NS, not significant; \*,  $p < 0.05$ ; \*\*,  $p < 0.01$ ; \*\*\*,  $p < 0.001$  using One-way ANOVA with Bonferroni's multiple-comparison test. All data are expressed as mean  $\pm$  SD.

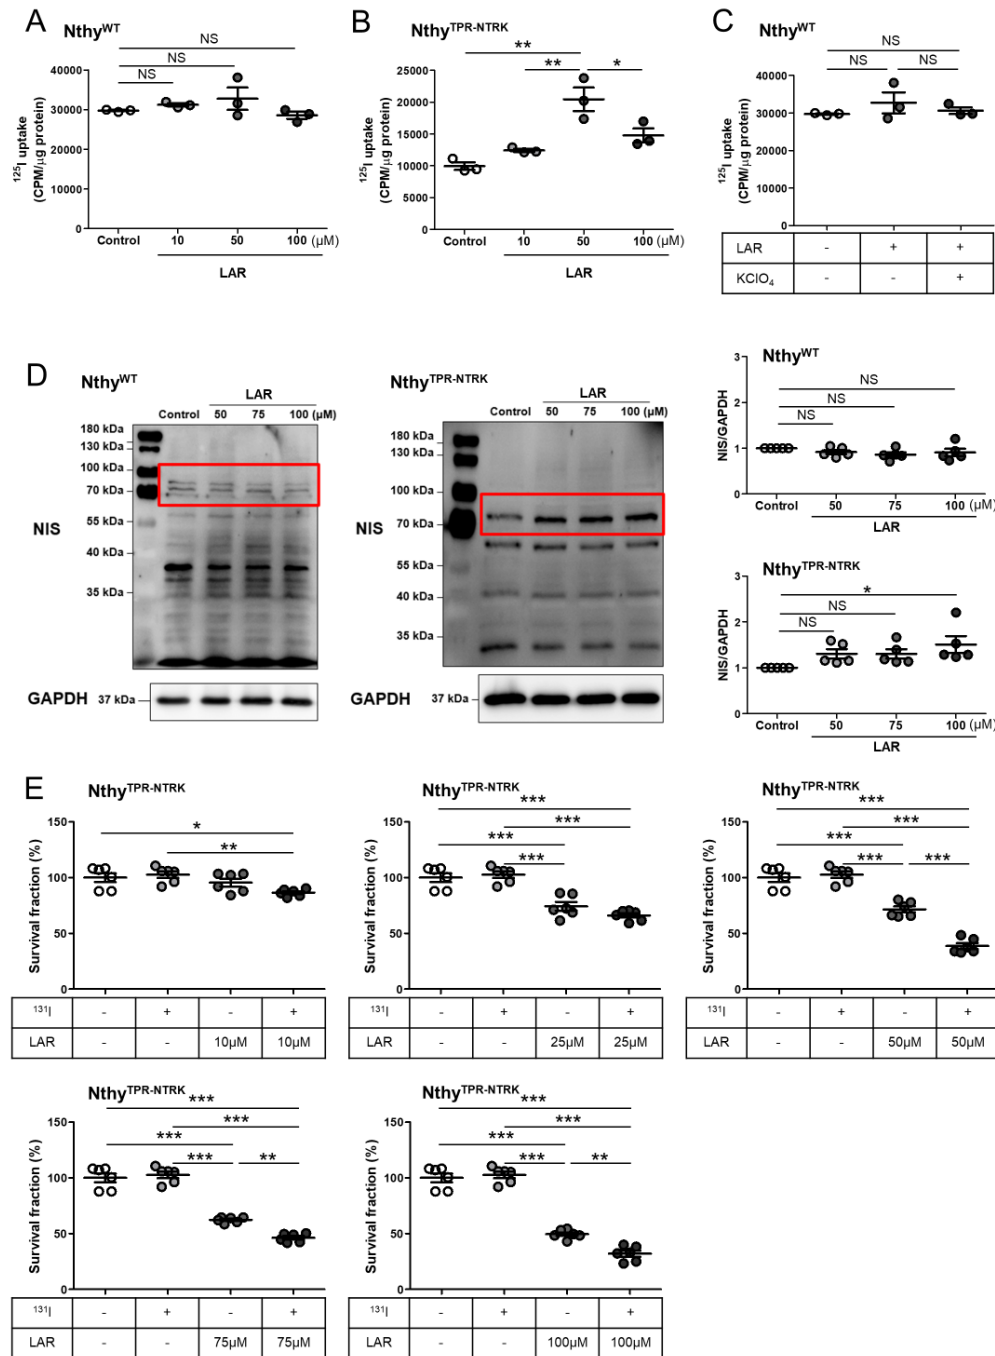

**Supplemental Figure 5.** The human TPR-NTRK1 expression vector constructed by subcloning the corresponding cDNA into a pcDNA6/V5-His A expression vector (ThermoFisher).

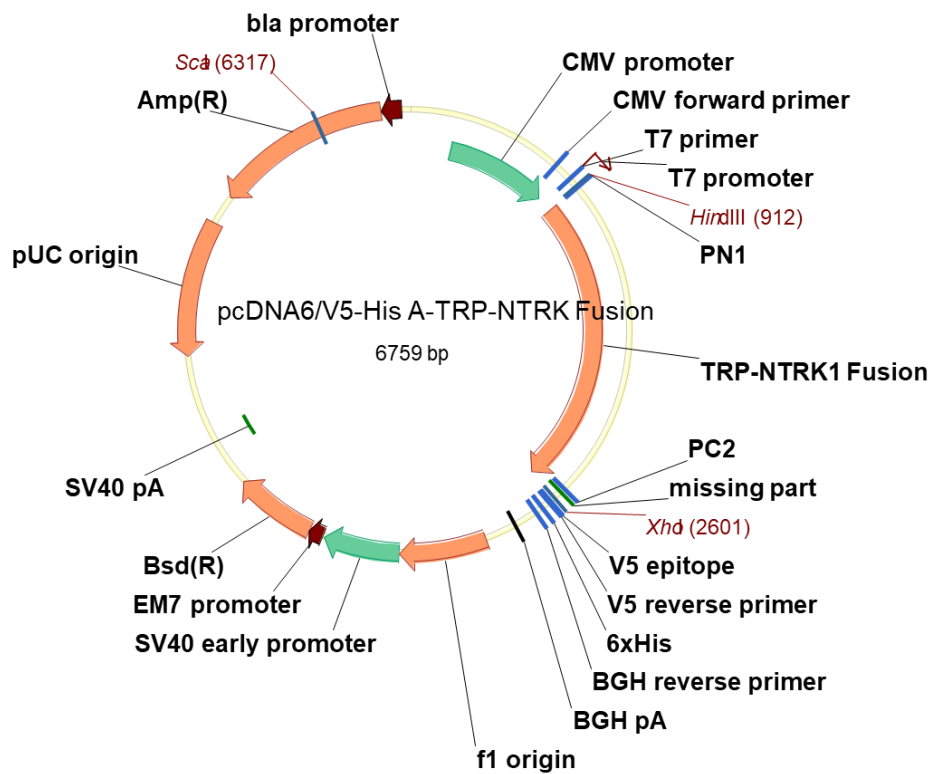

**Supplemental Figure 6.** Relative expression by real-time PCR (qPCR) of NTRK1 genes among Nthy<sup>WT</sup> cells, normal thyroid tissue, Nthy<sup>TPR-NTRK</sup> cells, and thyroid cancer tissue with a TPR-NTRK fusion

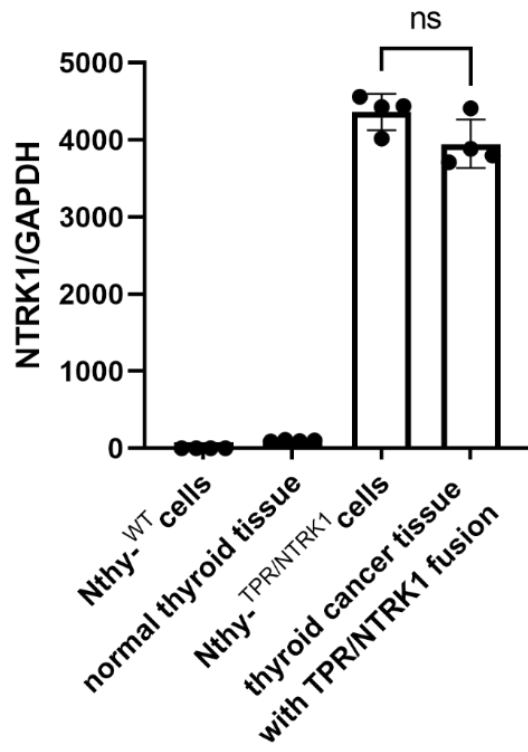

## Supplemental Tables

Supplemental Table 1. Genetic analysis performed in available tumor tissue of 106 patients

| ID | Age  | Sex | RT history | PTC subtypes        | Genetic alterations | NGS | WGS       | Targeted seq      | RNAseq            | BRAF seq or IHC | RAS seq | DICER1 seq | TERT seq | RET FIS H | TRK FIS H | TRK IHC | ALK IHC | RAS IHC |
|----|------|-----|------------|---------------------|---------------------|-----|-----------|-------------------|-------------------|-----------------|---------|------------|----------|-----------|-----------|---------|---------|---------|
| 1  | 4.3  | F   | Neg        | cPTC                | <i>TPR-NTRK1</i>    | Suc | TPR-NTRK1 | <i>TPR-NTRK1</i>  | <i>TPR-NTRK1</i>  | Neg             | ND      | ND         | Neg      | ND        | Pos       | ND      | ND      | ND      |
| 2  | 5.2  | F   | Neg        | FVPTC, infiltrative | <i>ETV6-NTRK3</i>   | Suc | ND        | <i>ETV6-NTRK3</i> | <i>ETV6-NTRK3</i> | Neg             | ND      | ND         | Neg      | Fail      | Pos       | Neg     | Neg     | Neg     |
| 3  | 10.3 | F   | Neg        | FVPTC, infiltrative | <i>ETV6-NTRK3</i>   | Suc | ND        | <i>ETV6-NTRK3</i> | Neg               | Neg             | Neg     | Neg        | Neg      | ND        | ND        | ND      | ND      | ND      |
| 4  | 14.2 | F   | Neg        | cPTC                | <i>TPM3-NTRK1</i>   | Suc | ND        | ND                | <i>TPM3-NTRK1</i> | Neg             | ND      | ND         | Neg      | Neg       | ND        | Pos     | Neg     | ND      |
| 5  | 5.1  | F   | Neg        | cPTC                | <i>VCL-RET</i>      | Suc | ND        | <i>VCL-RET</i>    | Neg               | Neg             | ND      | ND         | Neg      | ND        | ND        | ND      | ND      | ND      |
| 6  | 6.4  | M   | Neg        | DSV-PTC             | <i>NCOA4-RET</i>    | Suc | ND        | <i>NCOA4-RET</i>  | <i>NCOA4-RET</i>  | Neg             | ND      | ND         | Neg      | ND        | ND        | ND      | ND      | ND      |
| 7  | 7.1  | F   | Neg        | DSV-PTC             | <i>TRIM24-RET</i>   | Suc | ND        | Fail              | <i>TRIM24-RET</i> | Neg             | ND      | ND         | Neg      | ND        | ND        | ND      | ND      | ND      |
| 8  | 7.4  | F   | Neg        | DSV-PTC             | <i>CCDC6-RET</i>    | Suc | ND        | ND                | <i>CCDC6-RET</i>  | Neg             | ND      | ND         | Neg      | Pos       | ND        | Neg     | Neg     | Neg     |
| 9  | 7.6  | F   | Neg        | cPTC                | <i>RET-NCOA4</i>    | Suc | ND        | <i>RET-NCOA4</i>  | Neg               | Neg             | ND      | ND         | Neg      | Neg       | ND        | Neg     | Neg     | Neg     |
| 10 | 7.8  | M   | Pos        | cPTC                | <i>NCOA4-RET</i>    | Suc | ND        | Fail              | <i>NCOA4-RET</i>  | Neg             | ND      | ND         | Neg      | Fail      | ND        | Neg     | Neg     | Neg     |
| 11 | 9.0  | M   | Neg        | DSV-PTC             | <i>ERC1-RET</i>     | Suc | ND        | <i>ERC1-RET</i>   | ND                | Neg             | ND      | ND         | ND       | ND        | ND        | ND      | ND      | ND      |
| 12 | 9.6  | M   | Neg        | cPTC                | <i>TRIM24-RET</i>   | Suc | ND        | Fail              | <i>TRIM24-RET</i> | Neg             | ND      | ND         | Neg      | ND        | ND        | ND      | ND      | ND      |

|    |      |   |     |         |                  |      |    |                  |                  |     |     |     |     |     |    |     |     |     |
|----|------|---|-----|---------|------------------|------|----|------------------|------------------|-----|-----|-----|-----|-----|----|-----|-----|-----|
| 13 | 9.9  | M | Neg | DSV-PTC | <i>NCOA4-RET</i> | Suc  | ND | <i>NCOA4-RET</i> | Neg              | Neg | ND  | ND  | Neg | Pos | ND | Neg | Neg | Neg |
| 14 | 10.1 | F | Neg | cPTC    | <i>NCOA4-RET</i> | Suc  | ND | <i>NCOA4-RET</i> | ND               | Neg | ND  | ND  | Neg | Neg | ND | Neg | Neg | Neg |
| 15 | 10.3 | F | Neg | DSV-PTC | <i>CCDC6-RET</i> | Suc  | ND | <i>CCDC6-RET</i> | ND               | Neg | ND  | ND  | Neg | ND  | ND | ND  | ND  | ND  |
| 16 | 10.4 | F | Neg | DSV-PTC | <i>NCOA4-RET</i> | Suc  | ND | <i>NCOA4-RET</i> | <i>NCOA4-RET</i> | Neg | ND  | ND  | Neg | Pos | ND | Neg | Neg | ND  |
| 17 | 10.5 | F | Neg | DSV-PTC | <i>CCDC6-RET</i> | Suc  | ND | <i>CCDC6-RET</i> | ND               | Neg | ND  | ND  | Neg | Pos | ND | Neg | Neg | Neg |
| 18 | 13.3 | F | Pos | cPTC    | <i>CCDC6-RET</i> | Suc  | ND | <i>CCDC6-RET</i> | <i>CCDC6-RET</i> | Neg | ND  | ND  | Neg | ND  | ND | ND  | ND  | ND  |
| 19 | 13.7 | F | Neg | DSV-PTC | <i>ANK3-RET</i>  | Suc  | ND | <i>ANK3-RET</i>  | <i>ANK3-RET</i>  | Neg | ND  | ND  | Neg | Neg | ND | Neg | Neg | Neg |
| 20 | 14.3 | F | Neg | DSV-PTC | <i>KTN1-RET</i>  | Suc  | ND | <i>KTN1-RET</i>  | ND               | Neg | ND  | ND  | Neg | Pos | ND | Neg | Neg | ND  |
| 21 | 14.5 | F | Neg | cPTC    | <i>CCDC6-RET</i> | Suc  | ND | <i>CCDC6-RET</i> | ND               | Neg | ND  | ND  | Neg | Pos | ND | Neg | Neg | Neg |
| 22 | 16.1 | M | Neg | cPTC    | <i>CCDC6-RET</i> | Suc  | ND | <i>CCDC6-RET</i> | ND               | Neg | ND  | ND  | Neg | Neg | ND | Neg | Neg | Neg |
| 23 | 16.1 | F | Neg | DSV-PTC | <i>CCDC6-RET</i> | Suc  | ND | <i>CCDC6-RET</i> | ND               | Neg | ND  | ND  | Neg | ND  | ND | ND  | ND  | ND  |
| 24 | 17.2 | F | Neg | cPTC    | <i>CCDC6-RET</i> | Suc  | ND | <i>CCDC6-RET</i> | ND               | Neg | ND  | ND  | Neg | Neg | ND | Neg | Neg | Neg |
| 25 | 18.9 | F | Neg | DSV-PTC | <i>CCDC6-RET</i> | Suc  | ND | <i>CCDC6-RET</i> | ND               | Neg | ND  | ND  | Neg | ND  | ND | ND  | ND  | ND  |
| 26 | 4.5  | F | Neg | DSV-PTC | <i>STRN-ALK</i>  | Suc  | ND | <i>STRN-ALK</i>  | <i>STRN-ALK</i>  | Neg | ND  | ND  | Neg | Neg | ND | Neg | Pos | Neg |
| 27 | 8.9  | F | Neg | cPTC    | <i>EML4-ALK</i>  | Suc  | ND | <i>EML4-ALK</i>  | <i>EML4-ALK</i>  | Neg | ND  | ND  | Neg | Neg | ND | Neg | Neg | Neg |
| 28 | 12.1 | F | Neg | cPTC    | <i>ALK*</i>      | Fail | ND | Fail             | Fail             | Neg | Neg | Neg | Neg | Neg | ND | Neg | Pos | Neg |

|    |      |   |     |                        |                             |      |    |                  |                             |     |     |     |     |      |    |     |     |     |
|----|------|---|-----|------------------------|-----------------------------|------|----|------------------|-----------------------------|-----|-----|-----|-----|------|----|-----|-----|-----|
| 29 | 15.6 | F | Neg | cPTC                   | <i>RBMS3-ALK</i>            | Suc  | ND | <i>RBMS3-ALK</i> | ND                          | Neg | ND  | ND  | Neg | Neg  | ND | Neg | Neg | Neg |
| 30 | 15.9 | F | Neg | cPTC                   | <i>ALK*</i>                 | Fail | ND | Fail             | Fail                        | Neg | Neg | Neg | Neg | ND   | ND | Neg | Pos | Neg |
| 31 | 18.1 | F | Pos | cPTC                   | <i>ALK*</i>                 | Fail | ND | Fail             | Fail                        | Neg | Neg | Neg | Neg | Neg  | ND | Neg | Pos | Neg |
| 32 | 11.3 | M | Neg | cPTC                   | <i>BRAF<sup>V600E</sup></i> | ND   | ND | ND               | ND                          | Pos | ND  | ND  | Neg | Neg  | ND | Neg | Neg | Neg |
| 33 | 12.2 | F | Neg | cPTC                   | <i>BRAF<sup>V600E</sup></i> | ND   | ND | ND               | ND                          | Pos | ND  | ND  | Neg | ND   | ND | Neg | Neg | Neg |
| 34 | 12.5 | F | Neg | cPTC                   | <i>BRAF<sup>V600E</sup></i> | ND   | ND | ND               | ND                          | Pos | ND  | ND  | Neg | Neg  | ND | Neg | Neg | Neg |
| 35 | 12.9 | F | Neg | cPTC                   | <i>BRAF<sup>V600E</sup></i> | ND   | ND | ND               | ND                          | Pos | ND  | ND  | Neg | ND   | ND | ND  | ND  | ND  |
| 36 | 13.1 | F | Neg | cPTC                   | <i>BRAF<sup>V600E</sup></i> | ND   | ND | ND               | ND                          | Pos | ND  | ND  | ND  | ND   | ND | ND  | ND  | ND  |
| 37 | 13.5 | F | Neg | PTC, tall cell variant | <i>BRAF<sup>V600E</sup></i> | ND   | ND | ND               | ND                          | Pos | ND  | ND  | Neg | Neg  | ND | Neg | Neg | Neg |
| 38 | 13.9 | F | Neg | cPTC                   | <i>BRAF<sup>V600E</sup></i> | ND   | ND | ND               | ND                          | Pos | ND  | ND  | Neg | Neg  | ND | Neg | Neg | Neg |
| 39 | 13.9 | F | Neg | N/A                    | <i>BRAF<sup>V600E</sup></i> | ND   | ND | ND               | ND                          | Pos | ND  | ND  | Neg | ND   | ND | ND  | ND  | ND  |
| 40 | 14.3 | F | Neg | cPTC                   | <i>BRAF<sup>V600E</sup></i> | ND   | ND | ND               | ND                          | Pos | ND  | ND  | Neg | Fail | ND | Neg | Neg | Neg |
| 41 | 14.5 | F | Pos | cPTC                   | <i>BRAF<sup>V600E</sup></i> | ND   | ND | ND               | ND                          | Pos | ND  | ND  | Neg | Neg  | ND | Neg | Neg | Neg |
| 42 | 14.5 | F | Neg | PTC, tall cell variant | <i>BRAF<sup>V600E</sup></i> | ND   | ND | ND               | ND                          | Pos | ND  | ND  | Neg | ND   | ND | ND  | ND  | ND  |
| 43 | 15.0 | M | Neg | cPTC                   | <i>BRAF<sup>V600E</sup></i> | ND   | ND | ND               | ND                          | Pos | ND  | ND  | Neg | Fail | ND | Neg | Neg | Neg |
| 44 | 15.2 | F | Neg | cPTC                   | <i>BRAF<sup>V600E</sup></i> | ND   | ND | ND               | ND                          | Pos | ND  | ND  | Neg | ND   | ND | ND  | ND  | ND  |
| 45 | 15.4 | F | Neg | cPTC                   | <i>BRAF<sup>V600E</sup></i> | ND   | ND | ND               | ND                          | Pos | ND  | ND  | Neg | Neg  | ND | Neg | Neg | Neg |
| 46 | 15.7 | F | Neg | cPTC                   | <i>BRAF<sup>V600E</sup></i> | ND   | ND | ND               | ND                          | Pos | ND  | ND  | Neg | ND   | ND | ND  | ND  | ND  |
| 47 | 15.8 | F | Neg | cPTC                   | <i>BRAF<sup>V600E</sup></i> | ND   | ND | ND               | ND                          | Pos | ND  | ND  | Neg | Neg  | ND | Neg | Neg | Neg |
| 48 | 15.9 | F | Neg | cPTC                   | <i>BRAF<sup>V600E</sup></i> | ND   | ND | ND               | ND                          | Pos | ND  | ND  | Neg | Neg  | ND | Neg | Neg | Neg |
| 49 | 16.0 | M | Neg | cPTC                   | <i>BRAF<sup>V600E</sup></i> | ND   | ND | ND               | ND                          | Pos | ND  | ND  | Neg | Fail | ND | Neg | Neg | Neg |
| 50 | 16.1 | F | Neg | cPTC                   | <i>BRAF<sup>V600E</sup></i> | ND   | ND | ND               | ND                          | Pos | ND  | ND  | Neg | Neg  | ND | Neg | Neg | Neg |
| 51 | 16.2 | F | Neg | cPTC                   | <i>BRAF<sup>V600E</sup></i> | Suc  | ND | ND               | <i>BRAF<sup>V600E</sup></i> | Pos | ND  | ND  | Neg | ND   | ND | ND  | ND  | ND  |
| 52 | 16.6 | F | Neg | cPTC                   | <i>BRAF<sup>V600E</sup></i> | ND   | ND | ND               | ND                          | Pos | ND  | ND  | Neg | Fail | ND | Neg | Neg | Neg |
| 53 | 16.7 | F | Neg | cPTC                   | <i>BRAF<sup>V600E</sup></i> | ND   | ND | ND               | ND                          | Pos | ND  | ND  | Neg | Neg  | ND | Neg | Neg | Neg |
| 54 | 16.7 | F | Neg | cPTC                   | <i>BRAF<sup>V600E</sup></i> | ND   | ND | ND               | ND                          | Pos | ND  | ND  | Neg | ND   | ND | ND  | ND  | ND  |

|    |      |   |     |                        |                                        |      |    |      |                             |     |     |                               |     |      |    |     |     |     |
|----|------|---|-----|------------------------|----------------------------------------|------|----|------|-----------------------------|-----|-----|-------------------------------|-----|------|----|-----|-----|-----|
| 55 | 16.8 | F | Neg | cPTC                   | <i>BRAF<sup>V600E</sup></i>            | ND   | ND | ND   | ND                          | Pos | ND  | ND                            | Neg | Fail | ND | Neg | Neg | Neg |
| 56 | 17.1 | F | Neg | cPTC                   | <i>BRAF<sup>V600E</sup></i>            | ND   | ND | ND   | ND                          | Pos | ND  | ND                            | ND  | ND   | ND | ND  | ND  | ND  |
| 57 | 17.3 | F | Neg | cPTC                   | <i>BRAF<sup>V600E</sup>/TERT C228T</i> | ND   | ND | ND   | ND                          | Pos | ND  | ND                            | Pos | Fail | ND | Neg | Neg | Neg |
| 58 | 17.3 | F | Neg | PTC, Hobnail variant   | <i>BRAF<sup>V600E</sup></i>            | ND   | ND | ND   | ND                          | Pos | ND  | ND                            | Neg | Fail | ND | Neg | Neg | Neg |
| 59 | 17.6 | M | Neg | cPTC                   | <i>BRAF<sup>V600E</sup></i>            | ND   | ND | ND   | ND                          | Pos | ND  | ND                            | Neg | Neg  | ND | Neg | Neg | Neg |
| 60 | 17.7 | F | Neg | cPTC                   | <i>BRAF<sup>V600E</sup></i>            | ND   | ND | ND   | ND                          | Pos | ND  | ND                            | Neg | Neg  | ND | Neg | Neg | Neg |
| 61 | 18.0 | F | Neg | cPTC                   | <i>BRAF<sup>V600E</sup></i>            | ND   | ND | ND   | ND                          | Pos | ND  | ND                            | Neg | Neg  | ND | Neg | Neg | Neg |
| 62 | 18.1 | F | Neg | cPTC                   | <i>BRAF<sup>V600E</sup></i>            | ND   | ND | ND   | ND                          | Pos | ND  | ND                            | Neg | Fail | ND | Neg | Neg | Neg |
| 63 | 18.7 | F | Neg | cPTC                   | <i>BRAF<sup>V600E</sup></i>            | ND   | ND | ND   | ND                          | Pos | ND  | ND                            | Neg | Fail | ND | Neg | Neg | Neg |
| 64 | 18.8 | F | Neg | cPTC                   | <i>BRAF<sup>V600E</sup></i>            | ND   | ND | ND   | ND                          | Pos | ND  | ND                            | Neg | Neg  | ND | Neg | Neg | Neg |
| 65 | 19.1 | F | Neg | PTC, tall cell variant | <i>BRAF<sup>V600E</sup></i>            | Suc  | ND | ND   | <i>BRAF<sup>V600E</sup></i> | Pos | ND  | ND                            | Neg | ND   | ND | ND  | ND  | ND  |
| 66 | 19.2 | M | Neg | cPTC                   | <i>BRAF<sup>V600E</sup></i>            | ND   | ND | ND   | ND                          | Pos | ND  | ND                            | Neg | Fail | ND | Neg | Neg | Neg |
| 67 | 19.2 | M | Neg | cPTC                   | <i>BRAF<sup>V600E</sup></i>            | ND   | ND | ND   | ND                          | Pos | ND  | ND                            | Neg | Neg  | ND | Neg | Neg | Neg |
| 68 | 19.5 | F | Neg | cPTC                   | <i>BRAF<sup>V600E</sup></i>            | ND   | ND | ND   | ND                          | Pos | ND  | ND                            | Neg | Fail | ND | Neg | Neg | Neg |
| 69 | 19.5 | F | Neg | cPTC                   | <i>BRAF<sup>V600E</sup></i>            | ND   | ND | ND   | ND                          | Pos | ND  | ND                            | Neg | Neg  | ND | Neg | Neg | Neg |
| 70 | 19.7 | F | Neg | cPTC                   | <i>BRAF<sup>V600E</sup></i>            | Suc  | ND | ND   | <i>BRAF<sup>V600E</sup></i> | Pos | ND  | ND                            | Neg | ND   | ND | ND  | ND  | ND  |
| 71 | 19.8 | F | Neg | cPTC                   | <i>BRAF<sup>V600E</sup></i>            | ND   | ND | ND   | ND                          | Pos | ND  | ND                            | Neg | Neg  | ND | Neg | Neg | Neg |
| 72 | 19.8 | F | Neg | N/A                    | <i>BRAF<sup>V600E</sup></i>            | ND   | ND | ND   | ND                          | Pos | ND  | ND                            | ND  | ND   | ND | ND  | ND  | ND  |
| 73 | 9.0  | F | Neg | cPTC                   | <i>TERT C228T</i>                      | Suc  | ND | Fail | Neg                         | Neg | ND  | ND                            | Pos | Neg  | ND | Neg | Neg | Neg |
| 74 | 12.4 | F | Neg | cPTC                   | <i>DICER1 c.5378delA, p.E1793fs</i>    | Fail | ND | Fail | Fail                        | Neg | Neg | <i>c.5378 delA, p.E1793fs</i> | Neg | Fail | ND | Neg | Neg | Neg |
| 75 | 16.1 | F | Neg | FVPTC, encapsulat      | <i>DICER1 c.5113 G&gt;A, p.E1705K</i>  | Fail | ND | Fail | Fail                        | Neg | Neg | <i>c.5113 G&gt;A,</i>         | Neg | Neg  | ND | Neg | Neg | Neg |

|    |      |   |     |                        |                                                                                                                           |      |    |                                                                          |      |     |     |                                                   |     |      |    |     |     |     |
|----|------|---|-----|------------------------|---------------------------------------------------------------------------------------------------------------------------|------|----|--------------------------------------------------------------------------|------|-----|-----|---------------------------------------------------|-----|------|----|-----|-----|-----|
|    |      |   |     | ed<br>invasive         |                                                                                                                           |      |    |                                                                          |      |     |     | <i>p.E170<br/>5K</i>                              |     |      |    |     |     |     |
| 76 | 17.7 | F | Neg | cPTC                   | <i>DICER1</i><br><i>c.5113 G&gt;A,</i><br><i>p.E1705K</i>                                                                 | Fail | ND | Fail                                                                     | Fail | Neg | Neg | <i>c.5113<br/>G&gt;A,</i><br><i>p.E170<br/>5K</i> | Neg | Fail | ND | Neg | Neg | Neg |
| 77 | 19.0 | M | Pos | cPTC                   | <i>DICER1</i><br><i>c.5126 A&gt;G,</i><br><i>p.D1709G,</i><br><i>LOH chr14q,</i><br><i>chr16q,</i><br><i>chr21, chr22</i> | Suc  | ND | <i>DICER<br/>1</i><br><i>c.5126<br/>A&gt;G,</i><br><i>p.D170<br/>9G,</i> | ND   | Neg | ND  | <i>c.5126<br/>A&gt;G,</i><br><i>p.D170<br/>9G</i> | Neg | ND   | ND | ND  | ND  | ND  |
| 78 | 19.6 | F | Neg | cPTC                   | <i>DICER1</i><br><i>c.5437 G&gt;A,</i><br><i>p.E1813K</i>                                                                 | Suc  | ND | <i>DICER<br/>1</i><br><i>c.5437<br/>G&gt;A,</i><br><i>p.E181<br/>3K</i>  | ND   | Neg | ND  | ND                                                | Neg | ND   | ND | ND  | ND  | ND  |
| 79 | 11.5 | M | Pos | cPTC                   | <i>FGFR1 amp</i>                                                                                                          | Suc  | ND | <i>FGFR1<br/>amp</i>                                                     | ND   | Neg | ND  | ND                                                | Neg | ND   | ND | ND  | ND  | ND  |
| 80 | 17.7 | M | Pos | cPTC                   | <i>EGFR amp</i>                                                                                                           | Suc  | ND | <i>EGFR<br/>amp</i>                                                      | ND   | Neg | ND  | ND                                                | Neg | ND   | ND | ND  | ND  | ND  |
| 81 | 10.8 | F | Neg | cPTC                   | Neg                                                                                                                       | Suc  | ND | Neg                                                                      | Fail | Neg | Neg | Neg                                               | Neg | Neg  | ND | Neg | Neg | Neg |
| 82 | 11.3 | F | Neg | cPTC                   | Neg                                                                                                                       | Suc  | ND | Neg                                                                      | Fail | Neg | ND  | Neg                                               | Neg | Neg  | ND | Neg | Neg | Neg |
| 83 | 11.3 | F | Neg | cPTC                   | Neg                                                                                                                       | Suc  | ND | Neg                                                                      | Fail | Neg | Neg | Neg                                               | Neg | Neg  | ND | Neg | Neg | Neg |
| 84 | 12.5 | M | Neg | cPTC                   | Neg                                                                                                                       | Suc  | ND | Neg                                                                      | Fail | Neg | ND  | Neg                                               | Neg | Neg  | ND | Neg | Neg | Neg |
| 85 | 12.7 | F | Neg | cPTC                   | Neg                                                                                                                       | Suc  | ND | Neg                                                                      | Fail | Neg | Neg | Neg                                               | Neg | Neg  | ND | Neg | Neg | Neg |
| 86 | 13.5 | F | Neg | PTC, solid             | Neg                                                                                                                       | Suc  | ND | Neg                                                                      | Fail | Neg | ND  | Neg                                               | Neg | Neg  | ND | Neg | Neg | Neg |
| 87 | 13.8 | F | Neg | cPTC                   | Neg                                                                                                                       | Suc  | ND | Neg                                                                      | Fail | Neg | Neg | Neg                                               | Neg | Neg  | ND | Neg | Neg | Neg |
| 88 | 15.0 | F | Neg | FVPTC,<br>infiltrative | Neg                                                                                                                       | Suc  | ND | Neg                                                                      | Fail | Neg | ND  | Neg                                               | Neg | ND   | ND | ND  | ND  | ND  |

|     |      |   |     |                                        |      |      |    |      |      |     |     |     |     |      |    |     |     |     |
|-----|------|---|-----|----------------------------------------|------|------|----|------|------|-----|-----|-----|-----|------|----|-----|-----|-----|
| 89  | 16.0 | M | Neg | cPTC,<br>FVPTC                         | Neg  | Suc  | ND | Neg  | Fail | Neg | ND  | Neg | Neg | ND   | ND | ND  | ND  | ND  |
| 90  | 17.0 | F | Neg | cPTC                                   | Neg  | Suc  | ND | Fail | Neg  | Neg | Neg | Neg | ND  | ND   | ND | ND  | ND  | ND  |
| 91  | 18.0 | M | Neg | FVPTC,<br>encapsulat<br>ed<br>invasive | Neg  | Suc  | ND | Neg  | Fail | Neg | ND  | Neg | Neg | Neg  | ND | Neg | Neg | Neg |
| 92  | 10.9 | F | Neg | DSV-PTC                                | Fail | Fail | ND | Fail | Fail | Neg | Neg | Neg | Neg | Fail | ND | Neg | Neg | Neg |
| 93  | 11.7 | F | Neg | PTC, solid<br>variant                  | Fail | Fail | ND | Fail | Fail | Neg | Neg | Neg | Neg | Fail | ND | ND  | ND  | ND  |
| 94  | 12.0 | M | Neg | FVPTC,<br>encapsulat<br>ed<br>invasive | Fail | Fail | ND | Fail | Fail | Neg | Neg | Neg | Neg | ND   | ND | ND  | ND  | ND  |
| 95  | 12.4 | F | Neg | cPTC                                   | Fail | Fail | ND | Fail | Fail | Neg | Neg | Neg | Neg | Neg  | ND | Neg | Neg | Neg |
| 96  | 13.0 | M | Pos | cPTC                                   | Fail | Fail | ND | Fail | Fail | Neg | Neg | Neg | Neg | ND   | ND | ND  | ND  | ND  |
| 97  | 13.7 | M | Neg | cPTC                                   | Fail | Fail | ND | Fail | Fail | Neg | Neg | Neg | Neg | Fail | ND | Neg | Neg | Neg |
| 98  | 14.0 | F | Pos | cPTC,<br>PTC, solid<br>variant         | Fail | Fail | ND | Fail | Fail | Neg | Neg | Neg | Neg | ND   | ND | ND  | ND  | ND  |
| 99  | 14.4 | F | Neg | cPTC                                   | Fail | Fail | ND | Fail | Fail | Neg | Neg | Neg | Neg | Neg  | ND | Neg | Neg | Neg |
| 100 | 14.5 | F | Neg | cPTC                                   | Fail | Fail | ND | Fail | Fail | Neg | Neg | Neg | Neg | Fail | ND | Neg | Neg | Neg |
| 101 | 16.2 | F | Neg | FVPTC,<br>infiltrative                 | Fail | Fail | ND | Fail | Fail | Neg | Neg | Neg | Neg | Fail | ND | Neg | Neg | Neg |
| 102 | 16.3 | F | Neg | FVPTC,<br>infiltrative                 | Fail | Fail | ND | Fail | Fail | Neg | Neg | Neg | Neg | Neg  | ND | Neg | Neg | Neg |
| 103 | 16.6 | F | Neg | cPTC                                   | Fail | Fail | ND | Fail | Fail | Neg | Neg | Neg | Neg | Neg  | ND | Neg | Neg | Neg |
| 104 | 17.5 | F | Neg | cPTC                                   | Fail | Fail | ND | Fail | Fail | Neg | Neg | Neg | Neg | Neg  | ND | Neg | Neg | Neg |
| 105 | 18.3 | M | Neg | cPTC                                   | Fail | Fail | ND | Fail | Fail | Neg | Neg | Neg | Neg | Neg  | ND | Neg | Neg | Neg |
| 106 | 18.4 | F | Neg | cPTC                                   | Fail | Fail | ND | Fail | Fail | Neg | Neg | Neg | Neg | Fail | ND | Neg | Neg | Neg |

\* Fusions where no 5' partner specified

RT, radiation therapy; NGS, next generation sequencing; WGS, whole genome sequencing; seq, sequencing, IHC, immunohistochemistry; FISH, *fluorescence in situ hybridization* ; Suc, success; Neg, negative; ND, not done; Pos, positive; cPTC, classic PTC; FVPTC, follicular variant PTC; DSV-PTC, diffuse sclerosing variant PTC; amp, amplification

**Supplemental Table 2.** Genetic alterations according to age at diagnosis

| Age                           | Fusion     |            |            | Point mutation               |                        |               |            | Amplification | Identified | No driver identified |
|-------------------------------|------------|------------|------------|------------------------------|------------------------|---------------|------------|---------------|------------|----------------------|
|                               | <i>TRK</i> | <i>RET</i> | <i>ALK</i> | <i>BRAF</i> <sup>V600E</sup> | <i>TERT</i>            | <i>DICER1</i> | <i>RAS</i> |               |            |                      |
| <10 years (n = 14)            | 2          | 9          | 2          | 0                            | 1                      | 0             | 0          | 0             | 14         | 0                    |
| 10-14.9 years (n = 40)        | 2          | 8          | 1          | 11                           | 0                      | 1             | 0          | 1             | 24         | 16                   |
| 15-19.9 years (n = 52)        | 0          | 4          | 3          | 30                           | 1*                     | 4             | 0          | 1             | 42         | 10                   |
| Total, n (detected/evaluated) | 4/90       | 21/70      | 6/90       | 41/106                       | 2(1 <sup>a</sup> )/102 | 5/66          | 0/94       | 2/45          | 80/106     | 26/106               |
| Total, % (detection)          | 4.4        | 30         | 6.7        | 38.7                         | 2.0                    | 7.6           | 0          | 5.0           | 75.5       | 24.5                 |

<sup>a</sup>Coexist with *BRAF*<sup>V600E</sup> (1.0%)

**Supplemental Table 3.** Breakpoint of fusion gene mutations identified from 28 patients

| ID | GeneA_GeneB                | Targeted sequencing | RNA sequencing | 5' Partner gene |                    |                     | 3' Partner gene |                     |                     |
|----|----------------------------|---------------------|----------------|-----------------|--------------------|---------------------|-----------------|---------------------|---------------------|
|    |                            |                     |                | Gene Name       | Last Observed Exon | Inferred Breakpoint | Gene Name       | First Observed Exon | Inferred Breakpoint |
| 1  | <i>TPR-NTRK1</i>           | Positive            | Positive       | TPR             | Exon21             | chr1:186,317,649    | NTRK1           | Exon10              | chr1:156,844,312    |
| 2  | <i>ETV6-NTRK3</i>          | Negative            | Positive       | ETV6            | Exon4              | -                   | NTRK3           | Exon14              | -                   |
| 3  | <i>ETV6-NTRK3</i>          | Positive            | Negative       | ETV6            | Exon4              | chr12:12,019,359    | NTRK3           | Exon14              | chr13:88,636,734    |
| 4  | <i>TPM3-NTRK1</i>          | ND                  | Positive       | TPM3            | Exon7              | -                   | NTRK1           | Exon10              |                     |
| 5  | <i>VCL-RET<sup>a</sup></i> | Positive            | Negative       | VCL             | Exon18             | chr10:75,870,829    | RET             | Exon12              | chr10:43,610,293    |
| 6  | <i>NCOA4-RET</i>           | Positive            | Positive       | NCOA4           | Exon8              | chr10:51,582,992    | RET             | Exon12              | chr10:43,611,619    |
| 7  | <i>TRIM24-RET</i>          | Fail                | Positive       | TRIM24          | Exon9              | -                   | RET             | Exon12              | -                   |
| 8  | <i>CCDC6-RET</i>           | ND                  | Positive       | CCDC6           | Exon1              | -                   | RET             | Exon12              | -                   |
| 9  | <i>RET-NCOA4</i>           | Positive            | Negative       | RET             | Exon11             | chr10:43,610,159    | NCOA4           | Exon8               | chr10:51,584,672    |
| 10 | <i>NCOA4-RET</i>           | Fail                | Positive       | NCOA4           | Exon8              | -                   | RET             | Exon12              | -                   |
| 11 | <i>ERC1-RET</i>            | Positive            | ND             | ERC1            | Exon18             | -                   | RET             | Exon12              | -                   |
| 12 | <i>TRIM24-RET</i>          | Fail                | Positive       | TRIM24          | Exon9              | -                   | RET             | Exon12              | -                   |
| 13 | <i>NCOA4-RET</i>           | Positive            | Negative       | NCOA4           | Exon8              | chr10:51,582,527    | RET             | Exon12              | chr10:43,611,276    |
| 14 | <i>NCOA4-RET</i>           | Positive            | ND             | NCOA4           | Exon8              | chr10:51,584,750    | RET             | Exon12              | chr10:43,611,312    |
| 15 | <i>CCDC6-RET</i>           | Positive            | ND             | CCDC6           | Exon2              | chr10:61,641,920    | RET             | Exon12              | chr10:43,610,676    |
| 16 | <i>NCOA4-RET</i>           | Positive            | Positive       | NCOA4           | Exon8              | -                   | RET             | Exon12              |                     |
| 17 | <i>CCDC6-RET</i>           | Positive            | ND             | CCDC6           | Exon2              | chr10:61,638,687    | RET             | Exon12              | chr10:43,610,820    |
| 18 | <i>CCDC6-RET</i>           | Positive            | ND             | CCDC6           | Exon2              | chr10:61,627,804    | RET             | Exon12              | chr10:43,611,457    |
| 19 | <i>ANK3-RET</i>            | Positive            | ND             | ANK3            | Exon2              | chr10:62,451,714    | RET             | Exon11              | chr10:43,610,112    |
| 20 | <i>KTN1-RET</i>            | Positive            | ND             | KTN1            | Exon12             | chr14:56,105,452    | RET             | Exon12              | chr10:43,611,421    |
| 21 | <i>CCDC6-RET</i>           | Positive            | ND             | CCDC6           | Exon2              | chr10:61,649,689    | RET             | Exon12              | chr10:43,611,478    |
| 22 | <i>CCDC6-RET</i>           | Positive            | ND             | CCDC6           | Exon2              | chr10:61,661,536    | RET             | Exon12              | chr10:43,610,671    |
| 23 | <i>CCDC6-RET</i>           | Positive            | ND             | CCDC6           | Exon2              | chr10:61,618,874    | RET             | Exon12              | chr10:43,610,001    |
| 24 | <i>CCDC6-RET</i>           | Positive            | ND             | CCDC6           | Exon2              | chr10:61,660,861    | RET             | Exon12              | chr10:43,610,186    |
| 25 | <i>CCDC6-RET</i>           | Positive            | ND             | CCDC6           | Exon2              | chr10:61,627,124    | RET             | Exon12              | chr10:43,611,275    |
| 26 | <i>STRN-ALK</i>            | Positive            | Positive       | STRN            | Exon3              | chr2:37,132,992     | ALK             | Exon20              | chr2:29,446,975     |

|    |                               |          |          |       |        |                 |     |        |                 |
|----|-------------------------------|----------|----------|-------|--------|-----------------|-----|--------|-----------------|
| 27 | <i>EML4-ALK</i>               | Positive | Positive | EML4  | Exon13 | chr2:42,527,903 | ALK | Exon20 | chr2:29,448,236 |
| 29 | <i>RBMS3-ALK</i> <sup>a</sup> | Positive | ND       | RBMS3 | Exon3  | chr3:29,572,596 | ALK | Exon20 | chr2:29,447,452 |

<sup>a</sup>*VCL/RET* and *RBMS3-ALK* fusion have not been reported in COSMIC or TCGA Fusion Gene database or previous reports.

'- Accurate breakpoint is not known

**Supplemental Table 4.** Genetic alterations of pediatric PTC patients based on previous studies

| Author, date              | Age (yrs) | Evaluated (n) | Detection |      | Fusion |      |     |      |       | Point mutation        |     |        |      |        | Amplification | Radiation or sporadic | Methods       |
|---------------------------|-----------|---------------|-----------|------|--------|------|-----|------|-------|-----------------------|-----|--------|------|--------|---------------|-----------------------|---------------|
|                           |           |               | n         | %    | RET    | NTKR | ALK | BRAF | PPARG | BRAF <sub>V600E</sub> | RAS | DICER1 | TERT | Others |               |                       |               |
| Fugazzola L, 1995 (19)    | 1-8       | 6             | 4         | 66.7 | 4      | 0    | ND  | ND   | ND    | ND                    | ND  | ND     | ND   | ND     | ND            | Radiation             | Southern blot |
| Williams, G.H. 1996 (20)  | 7-14      | 21            | 10        | 47.6 | 10     | ND   | ND  | ND   | ND    | ND                    | ND  | ND     | ND   | ND     | ND            | Sporadic              | RT-PCR        |
| Nikiforov, Y.E. 1997 (21) | 5-18      | 38            | 33        | 86.8 | 33     | ND   | ND  | ND   | ND    | ND                    | ND  | ND     | ND   | ND     | ND            | Radiation             | RT-PCR        |
|                           | 5-18      | 17            | 12        | 70.6 | 12     | ND   | ND  | ND   | ND    | ND                    | ND  | ND     | ND   | ND     | ND            | Sporadic              | RT-PCR        |
| Motomura, T. 1998 (22)    | 9         | 1             | 1         | 100  | 1      | ND   | ND  | ND   | ND    | ND                    | ND  | ND     | ND   | ND     | ND            | Sporadic              | RT-PCR        |
|                           | 10-14     | 9             | 2         | 22.2 | 2      | ND   | ND  | ND   | ND    | ND                    | ND  | ND     | ND   | ND     | ND            | Sporadic              |               |
| Thomas, G.A. 1999 (23)    | 6-18      | 67            | 37        | 55.2 | 37     | ND   | ND  | ND   | ND    | ND                    | ND  | ND     | ND   | ND     | ND            | Radiation             | RT-PCR        |
| Fenton, C., 1999 (24)     | 6-9       | 2             | 0         | 0.0  | ND     | ND   | ND  | ND   | ND    | ND                    | 0   | ND     | ND   | ND     | ND            | Sporadic              | nested PCR    |
|                           | 10-21     | 29            | 2         | 6.9  | ND     | ND   | ND  | ND   | ND    | ND                    | 2   | ND     | ND   | ND     | ND            | Sporadic              |               |
| Santoro, M., 2000 (25)    | <15       | 106           | 36        | 34.0 | 36     | ND   | ND  | ND   | ND    | ND                    | 0   | ND     | ND   | ND     | ND            | Radiation             | RT-PCR        |
| Fenton, C.L. 2000 (25)    | 6-9       | 1             | 1         | 100  | 1      | ND   | ND  | ND   | ND    | ND                    | ND  | ND     | ND   | ND     | ND            | Sporadic              | RT-PCR        |
|                           | 10-21     | 32            | 14        | 43.8 | 14     | ND   | ND  | ND   | ND    | ND                    | ND  | ND     | ND   | ND     | ND            | Sporadic              |               |
|                           | 10-21     | 1             | 1         | 100  | 1      | ND   | ND  | ND   | ND    | ND                    | ND  | ND     | ND   | ND     | ND            | Radiation             |               |

|                             |       |    |    |      |    |    |    |    |    |    |    |    |    |    |    |                             |                              |
|-----------------------------|-------|----|----|------|----|----|----|----|----|----|----|----|----|----|----|-----------------------------|------------------------------|
| Rabes, H.M. 2000 (26)       | 0-14  | 99 | 54 | 54.5 | 50 | 4  | ND | Radiation                   | RT-multiplex PCR             |
| Pauws, E. 2001 (27)         | 9-16  | 8  | 0  | 0    | ND | ND | ND | ND | ND | ND | 0  | ND | ND | ND | ND | Sporadic                    | SSCP-analysis                |
| Elisei, R. 2001 (28)        | <18   | 25 | 19 | 76.0 | 19 | ND | Radiation                   | RT-PCR, Southern blot        |
|                             | <18   | 25 | 10 | 40.0 | 10 | ND | Sporadic                    |                              |
| Lima, J. 2004 (29)          | <18   | 17 | 1  | 5.9  | ND | ND | ND | ND | ND | 1  | ND | ND | ND | ND | ND | Sporadic                    | SSCP and sequencing analysis |
| Kumagai A, 2004 (30)        | ≤15   | 46 | 6  | 13.0 | 5  | ND | ND | ND | ND | 1  | 0  | ND | ND | ND | ND | Radiation                   | PCR, RT-PCR                  |
| Penko K, 2005 (31)          | 10-21 | 14 | 7  | 50.0 | ND | ND | ND | ND | ND | 7  | ND | ND | ND | ND | ND | Radiation (1) sporadic (13) | BRAF (PCR)                   |
| Rosenbaum E, 2005 (32)      | 10-17 | 20 | 4  | 20.0 | ND | ND | ND | ND | ND | 4  | ND | ND | ND | ND | ND | Sporadic                    | BRAF (PCR)                   |
| Espadinha, C, 2009 (33)     | 5-21  | 15 | 1  | 6.7  | ND | ND | ND | ND | ND | 1  | ND | ND | ND | ND | ND | Unknown                     | BRAF (PCR)                   |
| Sassolas G, 2012 (34)       | <20   | 28 | 11 | 39.3 | 8  | 0  | ND | ND | ND | 2  | 1  | ND | ND | ND | ND | Radiation (5) Sporadic (23) | PCR, RT-PCR                  |
| Ricarte-Filho JC, 2013 (35) | 5-9   | 2  | 0  | 0.0  | 0  | 0  | 0  | 0  | 0  | 0  | 0  | ND | ND | ND | ND | Sporadic (2)                | RT-PCR, NGS                  |
|                             | 10-23 | 25 | 18 | 66.7 | 7  | 2  | ND | 0  | 0  | 7  | 2  | ND | ND | ND | ND | Sporadic (27)               |                              |
|                             | 10-23 | 26 | 25 | 96.2 | 15 | 3  | ND | 2  | 1  | 2  | 0  | ND | ND | 2  | 0  | Radiation (26)              |                              |

|                               |       |    |    |      |    |    |    |    |    |    |    |    |    |    |    |                                    |                       |
|-------------------------------|-------|----|----|------|----|----|----|----|----|----|----|----|----|----|----|------------------------------------|-----------------------|
| Givens DJ,<br>2014 (36)       | <10   | 1  | 0  | 0.0  | ND | ND | ND | ND | ND | 0  | ND | ND | ND | ND | ND | Unknown                            | BRAF (PCR)            |
|                               | 10-18 | 18 | 7  | 38.9 | ND | ND | ND | ND | ND | 7  | ND | ND | ND | ND | ND | Unknown                            | BRAF (PCR)            |
| Henke LE,<br>2014 (37)        | <21   | 27 | 17 | 63.0 | ND | ND | ND | ND | ND | 17 | ND | ND | ND | ND | ND | Sporadic                           | BRAF (PCR)            |
| Ballester<br>LY, 2016<br>(38) | 10-19 | 25 | 15 | 60.0 | 5  | ND | ND | ND | ND | 10 | 0  | ND | ND | 1  | 0  | Radiation<br>(2) Sporadic<br>(23)  | NGS (cancer<br>panel) |
| Picarsic JL,<br>2016 (39)     | <10   | 2  | 2  | 100  | 0  | 2  | 0  | 0  | 0  | 0  | 0  | 0  | 0  | ND | ND | Sporadic                           | NGS (cancer<br>panel) |
|                               | 10-17 | 16 | 12 | 81.3 | 3  | 2  | 0  | 0  | 1  | 3  | 3  | 0  | 0  | 0  | 0  | Sporadic                           |                       |
| Mitsutake,<br>N. 2015<br>(40) | 9-22  | 67 | 54 | 80.6 | 7  | 4  | ND | 0  | ND | 43 | 0  | ND | 0  | ND | ND | Radiation                          | PCR, RT-PCR           |
| Nikita ME,<br>2016 (41)       | 7-18  | 34 | 19 | 55.9 | 6  | ND | ND | ND | 3  | 9  | 1  | ND | ND | ND | ND | Radiation<br>(2), Sporadic<br>(37) | PCR, RT-PCR           |
| Alzahrani<br>AS, 2016<br>(42) | 9-18  | 52 | 13 | 25.0 | ND | ND | ND | ND | ND | 12 | 0  | ND | 1  | ND | ND | Unknown                            | PCR                   |
| Prasad ML,<br>2016 (43)       | <10   | 1  | 1  | 100  | 0  | 1  | 0  | 0  | 0  | 0  | 0  | 0  | 0  | 0  | 0  | Sporadic                           | NGS (cancer<br>panel) |
|                               | 10-18 | 26 | 25 | 96.2 | 6  | 6  | 0  | 0  | 0  | 13 | 0  | 0  | 0  | 0  | 0  | Sporadic                           |                       |
| Gertz, R.J.<br>2016 (44)      | 8-18  | 14 | 7  | 50.0 | 2  | ND | ND | ND | ND | 5  | 0  | ND | ND | ND | ND | Sporadic                           | PCR, RT-PCR,<br>FISH  |
| Onder, S.<br>2016 (45)        | 0-18  | 50 | 15 | 30.0 | ND | ND | ND | ND | ND | 15 | ND | ND | 0  | ND | ND | Radiation<br>(3), Sporadic<br>(47) | PCR                   |
|                               | 4-10  | 12 | 1  | 8.3  | ND | ND | ND | 1  | ND | Sporadic                           | RT-PCR, FISH          |

|                            |       |    |    |      |    |    |    |    |    |    |    |    |    |    |    |                              |                    |
|----------------------------|-------|----|----|------|----|----|----|----|----|----|----|----|----|----|----|------------------------------|--------------------|
| Cordioli MI, 2016 (46)     | 10-18 | 18 | 2  | 11.1 | ND | ND | ND | 2  | ND | Sporadic                     |                    |
| Alzahrani AS, 2017 (47)    | 8-17  | 79 | 25 | 31.6 | ND | ND | ND | ND | ND | 19 | 2  | 0  | 1  | 3  | 0  | Unknown                      | PCR                |
| Cordioli MI, 2017 (48)     | <10   | 12 | 6  | 50.0 | 4  | 1  | ND | 1  | ND | 0  | 0  | ND | ND | ND | ND | Sporadic                     | PCR, RT-PCR, FISH  |
|                            | 10-19 | 23 | 18 | 78.3 | 10 | 2  | ND | 3  | ND | 3  | 0  | ND | ND | ND | ND | Radiation (3) sporadic (20)  | PCR, RT-PCR, FISH  |
| Oishi, N, 2017 (49)        | 0-20  | 81 | 44 | 54.3 | ND | ND | ND | ND | ND | 44 | ND | ND | 0  | ND | ND | Sporadic                     | PCR (BARF TERT)    |
| Hardee, S. 2017 (50)       | 0-21  | 50 | 24 | 48.0 | ND | ND | ND | ND | ND | 24 | ND | ND | ND | ND | ND | Unknown                      | PCR                |
| Mostoufi-Moab, S.2018 (51) | 0-18  | 62 | 30 | 48.4 | 12 | ND | ND | ND | 2  | 12 | 4  | ND | ND | ND | ND | Radiation (3) Sporadic (59)  | PCR, RT-PCR        |
| Wasserman JD, 2018 (52)    | 5-18  | 30 | 15 | 40.0 | 7  | ND | ND | ND | ND | 5  | ND | 3  | 0  | ND | ND | Radiation (2), Sporadic(28)  | PCR, RT-PCR        |
| Pozdeyev N, 2018 (53)      | <10   | 5  | 5  | 100  | 3  | 0  | 2  | 0  | 0  | 0  | 0  | 0  | 0  | ND | ND | Unknown                      | NGS (cancer panel) |
|                            | 10-19 | 10 | 4  | 40.0 | 1  | 0  | 3  | 0  | 0  | 0  | 0  | 0  | 0  | 0  | 0  | Unknown                      |                    |
| Huang, M. 2018 (54)        | <21   | 30 | 16 | 53.3 | ND | ND | ND | ND | ND | 16 | ND | ND | ND | ND | ND | Unknown                      | BRAF (PCR)         |
| Sisdelli, L. 2019 (55)     | 0-18  | 80 | 27 | 33.8 | ND | ND | ND | 15 | ND | 12 | ND | ND | ND | ND | ND | Radiation (3), Sporadic (77) | PCR, RT-PCR, FISH  |
|                            | 6-9   | 9  | 5  | 55.6 | 2  | 2  | 1  | 0  | ND | 0  | 0  | ND | 0  | 0  | 0  |                              |                    |

|                              |       |      |     |      |     |    |    |    |    |     |    |    |                    |   |   |                             |                                            |
|------------------------------|-------|------|-----|------|-----|----|----|----|----|-----|----|----|--------------------|---|---|-----------------------------|--------------------------------------------|
| Pekova B, 2020 (56)          | 10-19 | 84   | 64  | 79.8 | 24  | 15 | 5  | 2  | ND | 18  | 2  | ND | 0                  | 1 | 0 | Radiation (2) Sporadic (89) | NGS (RNA and DNA targeted sequencing)      |
| Lee YA et al, this study     | 4-9   | 14   | 14  | 100  | 9   | 2  | 2  | 0  | 0  | 0   | 0  | 0  | 1                  | 0 | 0 | Radiation (1) Sporadic (13) | PCR, FISH, NGS (cancer panel, RNAseq), IHC |
|                              | 10-19 | 92   | 66  | 71.7 | 12  | 2  | 4  | 0  | 0  | 41  | 0  | 5  | 1 <sup>a</sup>     | 0 | 2 | Radiation (8) Sporadic (84) |                                            |
| Pooled analysis (June, 2020) | <10   | 68   | 40  | 58.8 | 24  | 8  | 5  | 2  | 0  | 0   | 0  | 0  | 1                  | 0 | 0 |                             |                                            |
|                              | 10-23 | 468  | 289 | 61.8 | 100 | 32 | 12 | 12 | 2  | 112 | 9  | 5  | 1 <sup>a</sup>     | 4 | 2 |                             |                                            |
|                              | <23   | 1704 | 866 | 50.8 | 379 | 47 | 17 | 29 | 7  | 350 | 17 | 8  | 4(1 <sup>a</sup> ) | 7 | 2 |                             |                                            |

<sup>a</sup>Coexist with *BRAF*<sup>V600E</sup>

**Supplemental Table 5.** Clinicopathological presentation and disease outcome in pediatric PTCs harboring *BRAF*<sup>V600E</sup>

| ID | Age (yrs) | Sex | Sporadic or radiotherapy | PTC Subtype    | Genetic alteration           | Size (cm) | Multi-focality | ETE | LN meta | Distant meta | FU years | Disease outcome (any event) | Disease outcome (at last follow-up) |
|----|-----------|-----|--------------------------|----------------|------------------------------|-----------|----------------|-----|---------|--------------|----------|-----------------------------|-------------------------------------|
| 1  | 11.3      | M   | Sporadic                 | cPTC           | <i>BRAF</i> <sup>V600E</sup> | 0.6       | no             | yes | no      | no           | 4.3      | NED                         | NED                                 |
| 2  | 12.2      | F   | Sporadic                 | cPTC           | <i>BRAF</i> <sup>V600E</sup> | 3         | yes            | yes | yes     | no           | 19.5     | SD                          | NED                                 |
| 3  | 12.5      | F   | Sporadic                 | cPTC           | <i>BRAF</i> <sup>V600E</sup> | 0.9       | no             | yes | no      | no           | 8        | NED                         | NED                                 |
| 4  | 12.9      | F   | Sporadic                 | cPTC           | <i>BRAF</i> <sup>V600E</sup> | 0.5       | no             | no  | no      | no           | 2.4      | NED                         | NED                                 |
| 5  | 13.1      | F   | Sporadic                 | cPTC           | <i>BRAF</i> <sup>V600E</sup> | 0.6       | no             | no  | yes     | no           | 7.3      | NED                         | NED                                 |
| 6  | 13.5      | F   | Sporadic                 | PTC, tall cell | <i>BRAF</i> <sup>V600E</sup> | 2         | no             | yes | yes     | no           | 12.4     | NED                         | NED                                 |
| 7  | 13.9      | F   | Sporadic                 | cPTC           | <i>BRAF</i> <sup>V600E</sup> | 0.2       | no             | no  | yes     | no           | 4.6      | Recur                       | Recur                               |
| 8  | 14        | F   | Sporadic                 | N/A            | <i>BRAF</i> <sup>V600E</sup> | 0.8       | no             | no  | yes     | no           | 2        | NED                         | NED                                 |
| 9  | 14.3      | F   | Sporadic                 | cPTC           | <i>BRAF</i> <sup>V600E</sup> | 2.6       | yes            | yes | yes     | no           | 11.2     | BCD                         | BCD                                 |
| 10 | 14.5      | F   | Radiotherapy             | cPTC           | <i>BRAF</i> <sup>V600E</sup> | 0.6       | no             | yes | yes     | no           | 8.8      | BCD                         | BCD                                 |
| 11 | 14.5      | F   | Sporadic                 | PTC, tall cell | <i>BRAF</i> <sup>V600E</sup> | 0.5       | yes            | no  | no      | no           | 0.9      | Ongoing                     | Ongoing                             |
| 12 | 15        | M   | Sporadic                 | cPTC           | <i>BRAF</i> <sup>V600E</sup> | 0.8       | no             | yes | no      | no           | 8.9      | NED                         | NED                                 |
| 13 | 15.2      | F   | Sporadic                 | cPTC           | <i>BRAF</i> <sup>V600E</sup> | 0.6       | no             | no  | no      | no           | 3.8      | NED                         | NED                                 |
| 14 | 15.4      | F   | Sporadic                 | cPTC           | <i>BRAF</i> <sup>V600E</sup> | 1.1       | yes            | no  | yes     | no           | 11       | BCD                         | BCD                                 |
| 15 | 15.7      | F   | Sporadic                 | cPTC           | <i>BRAF</i> <sup>V600E</sup> | 0.6       | no             | yes | no      | no           | 3.2      | NED                         | NED                                 |
| 16 | 15.8      | F   | Sporadic                 | cPTC           | <i>BRAF</i> <sup>V600E</sup> | 2.2       | no             | no  | yes     | no           | 16.6     | NED                         | NED                                 |
| 17 | 15.9      | F   | Sporadic                 | cPTC           | <i>BRAF</i> <sup>V600E</sup> | 1.6       | no             | yes | yes     | no           | 1.5      | Ongoing                     | Ongoing                             |
| 18 | 16        | M   | Sporadic                 | cPTC           | <i>BRAF</i> <sup>V600E</sup> | 2.4       | yes            | yes | yes     | no           | 4.9      | BCD                         | BCD                                 |
| 19 | 16.1      | F   | Sporadic                 | cPTC           | <i>BRAF</i> <sup>V600E</sup> | 0.3       | no             | no  | no      | no           | 7        | NED                         | NED                                 |
| 20 | 16.2      | F   | Sporadic                 | cPTC           | <i>BRAF</i> <sup>V600E</sup> | 4.1       | no             | no  | yes     | no           | 1.6      | Ongoing                     | Ongoing                             |

|    |      |   |          |                   |                                                              |     |     |     |     |     |      |       |       |
|----|------|---|----------|-------------------|--------------------------------------------------------------|-----|-----|-----|-----|-----|------|-------|-------|
| 21 | 16.6 | F | Sporadic | cPTC              | <i>BRAF</i> <sup>V600E</sup>                                 | 1.6 | no  | yes | yes | no  | 14.5 | NED   | NED   |
| 22 | 16.7 | F | Sporadic | cPTC              | <i>BRAF</i> <sup>V600E</sup>                                 | 1.7 | no  | yes | yes | no  | 18.2 | NED   | NED   |
| 23 | 16.7 | F | Sporadic | cPTC              | <i>BRAF</i> <sup>V600E</sup>                                 | 0.9 | yes | yes | no  | no  | 4.8  | NED   | NED   |
| 24 | 16.8 | F | Sporadic | cPTC              | <i>BRAF</i> <sup>V600E</sup>                                 | 1.1 | yes | yes | NA  | no  | 11.6 | NED   | NED   |
| 25 | 17.1 | F | Sporadic | cPTC              | <i>BRAF</i> <sup>V600E</sup>                                 | 1.5 | yes | yes | yes | no  | 7.5  | NED   | NED   |
| 26 | 17.3 | F | Sporadic | cPTC              | <i>BRAF</i> <sup>V600E</sup><br><i>TERT</i> <sup>C228T</sup> | 1.5 | no  | yes | no  | no  | 9.5  | NED   | NED   |
| 27 | 17.3 | F | Sporadic | PTC,<br>Hobnail   | <i>BRAF</i> <sup>V600E</sup>                                 | 0.9 | no  | yes | yes | yes | 7.1  | NED   | NED   |
| 28 | 17.6 | M | Sporadic | cPTC              | <i>BRAF</i> <sup>V600E</sup>                                 | 3   | yes | yes | yes | NA  | 1    | NA    | NA    |
| 29 | 17.7 | F | Sporadic | cPTC              | <i>BRAF</i> <sup>V600E</sup>                                 | 1.8 | no  | no  | yes | no  | 7.8  | NED   | NED   |
| 30 | 18   | F | Sporadic | cPTC              | <i>BRAF</i> <sup>V600E</sup>                                 | 0.7 | no  | yes | yes | no  | 7.4  | NED   | NED   |
| 31 | 18.1 | F | Sporadic | cPTC              | <i>BRAF</i> <sup>V600E</sup>                                 | NA  | no  | NA  | NA  | no  | 14.9 | Recur | Recur |
| 32 | 18.7 | F | Sporadic | cPTC              | <i>BRAF</i> <sup>V600E</sup>                                 | 0.4 | yes | no  | no  | no  | 11.3 | NED   | NED   |
| 33 | 18.8 | F | Sporadic | cPTC              | <i>BRAF</i> <sup>V600E</sup>                                 | NA  | yes | NA  | yes | no  | 18.4 | Recur | NED   |
| 34 | 19.1 | F | Sporadic | PTC, tall<br>cell | <i>BRAF</i> <sup>V600E</sup>                                 | 4.3 | no  | yes | yes | no  | 4.5  | NED   | NED   |
| 35 | 19.2 | M | Sporadic | cPTC              | <i>BRAF</i> <sup>V600E</sup>                                 | 0.7 | no  | no  | yes | no  | 9.9  | NED   | NED   |
| 36 | 19.2 | M | Sporadic | cPTC              | <i>BRAF</i> <sup>V600E</sup>                                 | 2.5 | no  | no  | yes | no  | 17.9 | NED   | NED   |
| 37 | 19.5 | F | Sporadic | cPTC              | <i>BRAF</i> <sup>V600E</sup>                                 | NA  | NA  | NA  | NA  | no  | 37.3 | Recur | BCD   |
| 38 | 19.5 | F | Sporadic | cPTC              | <i>BRAF</i> <sup>V600E</sup>                                 | 2.6 | no  | yes | no  | no  | 19.8 | Recur | BCD   |
| 39 | 19.7 | F | Sporadic | cPTC              | <i>BRAF</i> <sup>V600E</sup>                                 | 0.7 | yes | no  | yes | no  | 7    | NED   | NED   |
| 40 | 19.8 | F | Sporadic | cPTC              | <i>BRAF</i> <sup>V600E</sup>                                 | 1.4 | yes | yes | yes | no  | 14.4 | NED   | NED   |
| 41 | 19.8 | F | Sporadic | NA                | <i>BRAF</i> <sup>V600E</sup>                                 | 0.8 | no  | yes | yes | no  | 10.3 | NED   | NED   |

ETE, extrathyroidal extension; LN, lymph node; meta, metastasis; FU, follow-up; cPTC, classic variant PTC; FVPTC, follicular variant PTC; DSV-PTC, diffuse sclerosing variant PTC; NED, no evidence disease; BCD, biochemical disease; and SD, structural disease.

**Supplemental Table 6.** Comparison between pediatric and adult patients at SNUH harboring a fusion oncogene (*TRK*, *RET*, or *ALK*) and *BRAF*<sup>V600E</sup>

|                                                                                  | Adult PTC patients<br>(Total 125 cases in SNUH) |                             | Fusion ( <i>TRK</i> , <i>RET</i> , or <i>ALK</i> )<br>pediatric vs. adult patients |                       |    |                         |         | <i>BRAF</i> <sup>V600E</sup><br>pediatric vs. adult patients |                           |    |                          |         |
|----------------------------------------------------------------------------------|-------------------------------------------------|-----------------------------|------------------------------------------------------------------------------------|-----------------------|----|-------------------------|---------|--------------------------------------------------------------|---------------------------|----|--------------------------|---------|
|                                                                                  | No.<br>evaluated                                | Total patients<br>(n = 125) | N                                                                                  | Adult<br>(n = 12)     | N  | Pediatric<br>(n = 31)   | p-value | N                                                            | Adult<br>(n = 68)         | N  | Pediatric<br>(n = 41)    | p-value |
| Age (yrs)                                                                        | 125                                             | 47.0 ± 12.9                 | 12                                                                                 | 40.6 ± 15.7           | 29 | 11.1 ± 4.2              | <0.001  | 68                                                           | 46.9 ± 12.1               | 41 | 16.3 ± 2.3               | <0.001  |
| Females, n (%)                                                                   | 125                                             | 91 (72.8)                   | 12                                                                                 | 10 (83.3)             | 29 | 25 (80.6)               | 1.000   | 68                                                           | 50 (73.5)                 | 41 | 35 (85.4)                | 0.163   |
| Thyroidectomy (total thyroidectomy/ lobectomy)                                   | 125                                             | 114/11 (91.2/8.8)           | 12                                                                                 | 12/0 (100/0)          | 29 | 30/1 (96.8/3.2)         | 1.000   | 68                                                           | 65/3 (95.6/4.4)           | 41 | 38/3 (92.7/7.3)          | 0.670   |
| LN dissection, total, n (%)                                                      | 125                                             | 9/116 (7.2/92.8)            | 12                                                                                 | 12 (100)              | 31 | 28 (90.3)               | 0.548   | 68                                                           | 67 (98.5)                 | 41 | 33 (82.5)                | 0.004   |
| Lateral LN dissection, n (%)                                                     | 125                                             | 19 (15.2)                   | 12                                                                                 | 5 (41.7)              | 31 | 22 (71.0)               | 0.092   | 68                                                           | 11 (16.2)                 | 40 | 11 (29.7)                | 0.133   |
| Radioiodine therapy, n (%)                                                       | 125                                             | 69 (55.2)                   | 12                                                                                 | 10 (83.3)             | 31 | 27 (87.1)               | 1.000   | 68                                                           | 37 (54.4)                 | 40 | 23 (57.5)                | 0.842   |
| PTC subtype (classic variant/ diffuse sclerosing variant/ other subtypes), n (%) | 125                                             | 77/0/48 (61.6/0/38.4)       | 12                                                                                 | 8/0/4 (66.7/0/33.3)   | 31 | 16/13/2 (51.6/41.9/6.5) | 0.634   | 68                                                           | 55/0/13 (80.9/0/19.1)     | 39 | 35/0/4 (89.7/0/10.3)     | 0.281   |
| Size (cm)                                                                        | 124                                             | 1.5 ± 1.0                   | 12                                                                                 | 1.8 ± 0.9             | 31 | 2.8 ± 1.5               | 0.055   | 67                                                           | 1.2 ± 0.5                 | 38 | 1.4 ± 1.0                | 0.232   |
| Size > 2cm, n (%)                                                                | 124                                             | 26 (21)                     | 12                                                                                 | 5 (41.7)              | 31 | 20 (64.5)               | 0.301   | 67                                                           | 7 (10.4)                  | 38 | 10 (26.3)                | 0.052   |
| Multifocality, n (%)                                                             | 125                                             | 34 (27.2)                   | 12                                                                                 | 4 (33.3)              | 31 | 14 (45.2)               | 0.731   | 68                                                           | 20 (29.4)                 | 40 | 13 (32.5)                | 0.829   |
| Extrathyroidal extension, n (%)                                                  | 125                                             | 59 (47.2)                   | 12                                                                                 | 6 (50.0)              | 31 | 26 (86.7)               | 0.020   | 68                                                           | 43 (63.2)                 | 38 | 23 (60.5)                | 0.836   |
| No/ minimal/ gross, n (%)                                                        | 125                                             | 66/42/17 (52.8/33.6/13.6)   | 12                                                                                 | 6/5/1 (50.0/41.7/8.3) | 31 | 4/17/9 (13.3/56.7/30.0) | 0.014   | 68                                                           | 25/31/12 (36.8/45.6/17.6) | 38 | 15/17/6 (39.5/44.7/15.8) | 0.752   |
| LN metastasis, n (%)                                                             | 125                                             | 59 (47.2)                   | 12                                                                                 | 9 (75.0)              | 31 | 29 (93.5)               | 0.123   | 68                                                           | 23 (33.8)                 | 38 | 26 (68.4)                | 0.001   |
| Lateral LN metastasis, n (%)                                                     | 125                                             | 15 (12.0)                   | 12                                                                                 | 6 (50.0)              | 31 | 11 (35.5)               | 0.492   | 68                                                           | 8 (11.8)                  | 35 | 6 (17.1)                 | 0.546   |
| Distant metastasis, n (%)                                                        | 125                                             | 3 (2.4)                     | 12                                                                                 | 1 (8.3)               | 31 | 13 (41.9)               | 0.067   | 68                                                           | 1 (1.5)                   | 40 | 1 (2.5)                  | 1.000   |
| Follow-up years, median (range)                                                  | 125                                             | 7.4 (0.1-13.3)              | 12                                                                                 | 6.3 (1.2-13.2)        | 31 | 4.8 (0.9-34.3)          | 0.443   | 68                                                           | 8.0 (0.1-13.3)            | 41 | 8.0 (0.6-37.3)           | 0.070   |
| Disease outcome at any event                                                     | 112                                             | 100/9/3                     | 12                                                                                 | 12/0/0                | 29 | 6/6/17                  | <0.001  | 60                                                           | 50/8/2                    | 37 | 27/4/6                   | 0.108   |

|                                                         |     |                           |    |                     |    |                                |        |    |                               |    |                               |       |
|---------------------------------------------------------|-----|---------------------------|----|---------------------|----|--------------------------------|--------|----|-------------------------------|----|-------------------------------|-------|
| (NED/ BCD/ SD), n (%)                                   |     | (89.3/8.0/2.7)            |    | (100/0/0)           |    | (20.7/20.7/<br>58.6)           |        |    | (83.3/13.3/3.<br>3)           |    | (73.0/10.8/1<br>6.2)          |       |
| Disease outcome at last follow-up (NED/ BCD/ SD), n (%) | 112 | 100/9/3<br>(89.3/8.0/2.7) | 12 | 12/0/0<br>(100/0/0) | 29 | 8/6/15<br>(27.6/20.7/<br>51.7) | <0.001 | 60 | 50/8/2<br>(83.3/13.3/3.<br>3) | 37 | 29/7/1<br>(78.4/18.9/2.<br>7) | 0.607 |

Data are expressed as means  $\pm$  standard deviation (means  $\pm$  SD) or number (%).

LN, lymph node; NED, no evidence disease; BCD, biochemical disease; and SD, structural disease.

**Supplemental Table 7.** Comparison between pediatric and adult patients in the TCGA database harboring a fusion oncogene (*TRK*, *RET*, or *ALK*) and *BRAF*<sup>V600E</sup>

|                                                                                    | Adult PTC patients<br>(Total 485 cases in TCGA database) |                              | Fusion ( <i>TRK</i> , <i>RET</i> , or <i>ALK</i> )<br>pediatric vs. adult patients |                          |    |                            |             | <i>BRAF</i> <sup>V600E</sup><br>pediatric vs. adult patients |                             |    |                         |             |
|------------------------------------------------------------------------------------|----------------------------------------------------------|------------------------------|------------------------------------------------------------------------------------|--------------------------|----|----------------------------|-------------|--------------------------------------------------------------|-----------------------------|----|-------------------------|-------------|
|                                                                                    | No. of<br>evaluated                                      | Total patients<br>(n = 485)  | N                                                                                  | Adult<br>(n = 42)        | N  | Pediatric<br>(n = 31)      | p-<br>value | N                                                            | Adult<br>(n = 241)          | N  | Pediatric<br>(n = 41)   | p-<br>value |
| Age (yrs)                                                                          | 485                                                      | 47.8 ± 15.3                  | 42                                                                                 | 38.8 ± 13.5              | 31 | 11.1 ± 4.2                 | <0.001      | 241                                                          | 48.0 ± 15.3                 | 41 | 16.3 ± 2.3              | <0.001      |
| Females, n (%)                                                                     | 485                                                      | 355 (73.2)                   | 42                                                                                 | 32 (76.2)                | 31 | 25 (80.6)                  | 0.778       | 241                                                          | 172 (71.4)                  | 41 | 35 (85.4)               | 0.084       |
| Radioiodine therapy, n (%)                                                         | 325                                                      | 182 (56.0)                   | 27                                                                                 | 12 (44.4)                | 31 | 27 (87.1)                  | 0.001       | 164                                                          | 88 (53.7)                   | 40 | 23 (57.5)               | 0.725       |
| PTC subtype (classic variant / diffuse sclerosing variant / other subtypes), n (%) | 485                                                      | 344/4/137<br>(70.9/0.8/28.2) | 42                                                                                 | 37/1/4<br>(69.8/2.4/9.5) | 31 | 16/13/2<br>(51.6/41.9/6.5) | 0.026       | 241                                                          | 194/1/46<br>(80.5/0.4/19.1) | 39 | 35/0/4<br>(89.7/0/10.3) | 0.173       |
| Size (cm)                                                                          | 485                                                      | 2.8 ± 1.6                    | 42                                                                                 | 2.7 ± 1.3                | 31 | 2.8 ± 1.5                  | 0.830       | 241                                                          | 2.8 ± 1.7                   | 38 | 1.4 ± 1.0               | <0.001      |
| Size > 2cm, n (%)                                                                  | 484                                                      | 326 (67.2)                   | 42                                                                                 | 28 (66.7)                | 31 | 20 (64.5)                  | 1.000       | 241                                                          | 156 (64.7)                  | 38 | 10 (26.3)               | <0.001      |
| Multifocality, n (%)                                                               | 484                                                      | 222 (45.9)                   | 41                                                                                 | 16 (39.0)                | 31 | 14 (45.2)                  | 0.636       | 241                                                          | 111 (46.1)                  | 40 | 13 (32.5)               | 0.124       |
| Extrathyroidal extension, n (%)                                                    | 485                                                      | 148 (30.5)                   | 42                                                                                 | 10 (23.8)                | 30 | 26 (86.7)                  | <0.001      | 241                                                          | 94 (39.0)                   | 38 | 23 (60.5)               | 0.014       |
| Lymph node metastasis, n (%)                                                       | 439                                                      | 217 (49.4)                   | 41                                                                                 | 28 (68.3)                | 31 | 29 (93.5)                  | 0.010       | 221                                                          | 118 (53.4)                  | 38 | 26 (68.4)               | 0.111       |
| Distant metastasis, n (%)                                                          | 280                                                      | 7 (2.5)                      | 25                                                                                 | 0 (0)                    | 31 | 13 (41.9)                  | <0.001      | 150                                                          | 4 (2.7)                     | 40 | 1 (2.5)                 | 1.000       |
| Follow-up years, median (range)                                                    | 485                                                      | 2.6 (0.1-14.8)               | 42                                                                                 | 2.7 (0.1-9.7)            | 31 | 4.8 (0.9-34.3)             | 0.006       | 241                                                          | 2.9 (0-14.9)                | 41 | 8.0 (0.6-37.3)          | <0.001      |
| Outcome (disease free/ recurred or progressed), n (%)                              | 471                                                      | 43 (9.1)                     | 41                                                                                 | 40/1<br>(97.6/2.4)       | 29 | 12/17<br>(41.4/58.6)       | <0.001      | 233                                                          | 26 (11.2)                   | 37 | 6 (16.2)                | 0.410       |

Data are expressed as means ± standard deviation (means ± SD) or number (%).

**Supplemental Table 8.** Nucleotide sequences of primers

| <b>For direct sequencing</b> |                                   |                                   |
|------------------------------|-----------------------------------|-----------------------------------|
| <b>Gene</b>                  | <b>Forward</b>                    | <b>Reverse</b>                    |
| TERT promoter                | CCCTTCACCTTCCAGCTC                | CAGCGCTGCCTGAAACTC                |
| NRAS 12/13                   | TACTGTACATGTGGCTCGCC              | CCGACAAGTGAGAGACAGGA              |
| NRAS 61                      | CCAGATAGGCAGAAATGGGC              | CCTTCGCCTGTCCTCATGT               |
| HRAS 12/13                   | CAGTCCTTGCTGCCTGGC                | CTCCCTGGTACCTCTCATGC              |
| HRAS 61                      | GCATGAGAGGTACCAGGGAG              | TGATGGCAAACACACACAGG              |
| KRAS 12/13                   | AAGCGTCGATGGAGGATTT               | TGTATCAAAGAATGGTCCTGCA            |
| KRAS 61                      | CGTCATCTTTGGAGCAGGAA              | ACTCCACTGCTCTAATCCCC              |
| BRAF 15                      | GCTTGCTCTGATAGGAAAATGAG           | GATACTCAGC AGCATCTCAGG            |
| DICER1 12                    | CCTAAATGCAGAACCCGAGA              | TGACACATTTTAAAAGATAACAATCA        |
| DICER1 16                    | TCTTCGGCTTGAAAAACCTG              | TCCAAAGTGCTGGAGTCATT              |
| DICER1 20                    | CTTTTGTGTGTGCGCTTTGT              | CTGCAGTCAAAAGGCAGTGA              |
| DICER1 21                    | GCTGCACATCAAGGTGCTAA              | CCATTGGCGAGATTTTGATT              |
| DICER1 23                    | GCTATGTTTCCCCTCCTTCC              | CATAGTCAGCCTCTTCCTTCG             |
| DICER1 24                    | ACTTCGGATCCCCTCAGATT              | CGATGCAAAGATGGTGTGTGT             |
| DICER1 25                    | TGGACTGCCTGTAAAAGTGG              | ACACCTGCCAGACTGTCTCC              |
| <b>For RT-PCR</b>            |                                   |                                   |
| <b>Fusion gene</b>           | <b>Forward</b>                    | <b>Reverse</b>                    |
| SLC5A5 (NIS)                 | CTGCCCCACTCCAGTACATGCC            | TGACGGTGAAGGAACCCTGAAG            |
| NTRK1                        | GGTGGAGAAGAAGGACGAAA              | TTGTTGAGCACAAGGAGCAG              |
| GAPDH                        | CAGCCTCAAGATCATCAGCA              | TGTGGTCATGAGTCCTTCCA              |
| <b>cDNA cloning</b>          |                                   |                                   |
| TPR-NTRK1                    | TAAAAGCTTATGACTCAAGATTTGAGAGGAGCA | AAACTCGAGTTGCAGCCGGGCGTGCACATCCTT |

PCR sequencing was performed with the BigDye Terminator 3.1 cycle sequencing ready reaction kit (Applied Biosystems, Foster City, Calif) and the ABI-Prism 3130xl genetic analyzer (Applied Biosystems).

**Supplemental Table 9.** Target gene lists of SNUH FIRST cancer panel (version 3)

|               |               |               |               |                |               |                |                |                |               |
|---------------|---------------|---------------|---------------|----------------|---------------|----------------|----------------|----------------|---------------|
| <i>ABL1</i>   | <i>AKT1</i>   | <i>AKT2</i>   | <i>AKT3</i>   | <i>ALK</i>     | <i>APC</i>    | <i>AR</i>      | <i>ARAF</i>    | <i>ARID1A</i>  | <i>ATM</i>    |
| <i>ATR</i>    | <i>AURKA</i>  | <i>AURKB</i>  | <i>AURKC</i>  | <i>AXL</i>     | <i>BAP1</i>   | <i>BARD1*</i>  | <i>BCL2</i>    | <i>BRAF</i>    | <i>BRCA1</i>  |
| <i>CDK6</i>   | <i>CDKN1A</i> | <i>CDKN1B</i> | <i>CDKN2A</i> | <i>CDKN2B</i>  | <i>CHEK1</i>  | <i>CHEK2</i>   | <i>CREBBP</i>  | <i>CSF1R</i>   | <i>CTNNB1</i> |
| <i>DDR1</i>   | <i>DDR2</i>   | <i>DICER1</i> | <i>DPYD</i>   | <i>EGFR</i>    | <i>EIF1AX</i> | <i>EMSY</i>    | <i>EP300</i>   | <i>EPCAM</i>   | <i>ERBB2</i>  |
| <i>ERBB3</i>  | <i>ERBB4</i>  | <i>ERCC2</i>  | <i>ERG</i>    | <i>ESR1</i>    | <i>ETV1</i>   | <i>EWSR1</i>   | <i>EZH2</i>    | <i>FAM175A</i> | <i>FANCA</i>  |
| <i>FANCC</i>  | <i>FANCD2</i> | <i>FANCG</i>  | <i>FANCI</i>  | <i>FANCL</i>   | <i>FANCM</i>  | <i>FBXW7</i>   | <i>FGF19</i>   | <i>FGF23</i>   | <i>FGFR1</i>  |
| <i>FGFR2</i>  | <i>FGFR3</i>  | <i>FGFR4</i>  | <i>FOXA1</i>  | <i>GNAQ</i>    | <i>GNAS</i>   | <i>GNB2L1</i>  | <i>HDAC1</i>   | <i>HRAS</i>    | <i>IDH1</i>   |
| <i>IDH2</i>   | <i>IGF1R</i>  | <i>IGF2</i>   | <i>IGFBP3</i> | <i>INPP4B</i>  | <i>IRF1</i>   | <i>JAK1</i>    | <i>JAK2</i>    | <i>JAK3</i>    | <i>JUN</i>    |
| <i>KDM5C</i>  | <i>KDM6A</i>  | <i>KDR</i>    | <i>KEAP1</i>  | <i>KIT</i>     | <i>KMT2D</i>  | <i>KRAS</i>    | <i>LATS1</i>   | <i>LATS2</i>   | <i>MAP2K1</i> |
| <i>MAP2K2</i> | <i>MAP2K4</i> | <i>MAP3K1</i> | <i>MAP3K4</i> | <i>MAPK1</i>   | <i>MAPK8</i>  | <i>MCL1</i>    | <i>MDM2</i>    | <i>MET</i>     | <i>MLH1</i>   |
| <i>MRE11A</i> | <i>MSH2</i>   | <i>MSH6</i>   | <i>MTOR</i>   | <i>MUTYH</i>   | <i>MYC</i>    | <i>MYCN</i>    | <i>NF1</i>     | <i>NF2</i>     | <i>NFE2L2</i> |
| <i>NOTCH1</i> | <i>NOTCH2</i> | <i>NOTCH3</i> | <i>NOTCH4</i> | <i>NRAS</i>    | <i>NRG1</i>   | <i>NTRK1</i>   | <i>NTRK2</i>   | <i>NTRK3</i>   | <i>NUTM1</i>  |
| <i>PAK2</i>   | <i>PALB2</i>  | <i>PARP1</i>  | <i>PARP2</i>  | <i>PBRM1</i>   | <i>PDGFB</i>  | <i>PDGFRA</i>  | <i>PDGFRB</i>  | <i>PIK3CA</i>  | <i>PMS2</i>   |
| <i>POLD1</i>  | <i>POLE</i>   | <i>POLQ</i>   | <i>PPARG</i>  | <i>PPP2R2A</i> | <i>PRKCB</i>  | <i>PTEN</i>    | <i>RAD21</i>   | <i>RAD50</i>   | <i>RAD51</i>  |
| <i>RAD51B</i> | <i>RAD51C</i> | <i>RAD51D</i> | <i>RAD54L</i> | <i>RB1</i>     | <i>RelA</i>   | <i>RET</i>     | <i>RHEB</i>    | <i>RICTOR</i>  | <i>RIT1</i>   |
| <i>RNF43</i>  | <i>ROS1</i>   | <i>RPTOR</i>  | <i>SDHB</i>   | <i>SETD2</i>   | <i>SMAD4</i>  | <i>SMARCA4</i> | <i>SMARCB1</i> | <i>SOX2</i>    | <i>SPOP</i>   |
| <i>SQSTM1</i> | <i>SRC</i>    | <i>SS18</i>   | <i>STAT1</i>  | <i>STAT6</i>   | <i>STK11</i>  | <i>SUMO1</i>   | <i>SYK</i>     | <i>TERT</i>    | <i>TFE3</i>   |
| <i>TOP2A</i>  | <i>TP53</i>   | <i>TP63</i>   | <i>TSC1</i>   | <i>TSC2</i>    | <i>TSHR</i>   | <i>UGT1A1</i>  | <i>VHL</i>     | <i>XRCC2</i>   | <i>ZBTB16</i> |

## Supplemental References

1. Lee YA, Jung HW, Kim HY, Choi H, Kim HY, Hah JH, et al. Pediatric patients with multifocal papillary thyroid cancer have higher recurrence rates than adult patients: a retrospective analysis of a large pediatric thyroid cancer cohort over 33 years. *J Clin Endocrinol Metab.* 2015;100(4):1619-29.
2. Jeon MJ, Kim YN, Sung TY, Hong SJ, Cho YY, Kim TY, et al. Practical Initial Risk Stratification Based on Lymph Node Metastases in Pediatric and Adolescent Differentiated Thyroid Cancer. *Thyroid.* 2018;28(2):193-200.
3. Xing M, Alzahrani AS, Carson KA, Viola D, Elisei R, Bendlova B, et al. Association between BRAF V600E mutation and mortality in patients with papillary thyroid cancer. *JAMA.* 2013;309(14):1493-501.
4. Yoo S-K, Song YS, Lee EK, Hwang J, Kim HH, Jung G, et al. Integrative analysis of genomic and transcriptomic characteristics associated with progression of aggressive thyroid cancer. *Nature Communications.* 2019;10(1):2764.
5. Li H, and Durbin R. Fast and accurate long-read alignment with Burrows-Wheeler transform. *Bioinformatics.* 2010;26(5):589-95.
6. Dobin A, Davis CA, Schlesinger F, Drenkow J, Zaleski C, Jha S, et al. STAR: ultrafast universal RNA-seq aligner. *Bioinformatics.* 2013;29(1):15-21.
7. Li H, Handsaker B, Wysoker A, Fennell T, Ruan J, Homer N, et al. The Sequence Alignment/Map format and SAMtools. *Bioinformatics.* 2009;25(16):2078-9.
8. McKenna A, Hanna M, Banks E, Sivachenko A, Cibulskis K, Kernytsky A, et al. The Genome Analysis Toolkit: a MapReduce framework for analyzing next-generation DNA sequencing data. *Genome Res.* 2010;20(9):1297-303.
9. Wang K, Li M, and Hakonarson H. ANNOVAR: functional annotation of genetic variants from high-throughput sequencing data. *Nucleic Acids Res.* 2010;38(16):e164.
10. Costello M, Pugh TJ, Fennell TJ, Stewart C, Lichtenstein L, Meldrim JC, et al. Discovery and characterization of artifactual mutations in deep coverage targeted capture sequencing data due to oxidative DNA damage during sample preparation. *Nucleic Acids Res.* 2013;41(6):e67.
11. Robinson JT, Thorvaldsdottir H, Winckler W, Guttman M, Lander ES, Getz G, et al. Integrative genomics viewer. *Nat Biotechnol.* 2011;29(1):24-6.
12. Lee SE, Hwang TS, Choi YL, Kim WY, Han HS, Lim SD, et al. Molecular Profiling of Papillary Thyroid Carcinoma in Korea with a High Prevalence of BRAF(V600E) Mutation. *Thyroid.* 2017;27(6):802-10.
13. Dugay F, Llamas-Gutierrez F, Gournay M, Medane S, Mazet F, Chiforeanu DC, et al. Clinicopathological characteristics of ROS1- and RET-rearranged NSCLC in caucasian patients: Data from a cohort of 713 non-squamous NSCLC lacking KRAS/EGFR/HER2/BRAF/PIK3CA/ALK alterations. *Oncotarget.* 2017;8(32):53336-51.
14. Kim MJ, Won JK, Jung KC, Kim JH, Cho SW, Park DJ, et al. Clinical Characteristics of Subtypes of Follicular Variant Papillary Thyroid Carcinoma. *Thyroid.* 2018;28(3):311-8.
15. Park G, Kim TH, Lee HO, Lim JA, Won JK, Min HS, et al. Standard immunohistochemistry efficiently screens for anaplastic lymphoma kinase rearrangements in differentiated thyroid cancer. *Endocr Relat Cancer.* 2015;22(1):55-63.
16. Yoo SK, Lee S, Kim SJ, Jee HG, Kim BA, Cho H, et al. Comprehensive Analysis of the Transcriptional and Mutational Landscape of Follicular and Papillary Thyroid Cancers. *PLoS Genet.* 2016;12(8):e1006239.
17. Cancer Genome Atlas Research N. Integrated genomic characterization of papillary thyroid carcinoma. *Cell.* 2014;159(3):676-90.
18. Xing M, Alzahrani AS, Carson KA, Shong YK, Kim TY, Viola D, et al. Association between BRAF V600E mutation and recurrence of papillary thyroid cancer. *J*

*Clin Oncol.* 2015;33(1):42-50.

19. Bahk J, and Khang YH. Trends in childhood obesity and central adiposity between 1998-2001 and 2010-2012 according to household income and urbanity in Korea. *BMC public health.* 2016;16:18.
20. Yi KH. The Revised 2016 Korean Thyroid Association Guidelines for Thyroid Nodules and Cancers: Differences from the 2015 American Thyroid Association Guidelines. *Endocrinology and metabolism.* 2016;31(3):373-8.
21. Francis GL, Waguespack SG, Bauer AJ, Angelos P, Benvenga S, Cerutti JM, et al. Management Guidelines for Children with Thyroid Nodules and Differentiated Thyroid Cancer. *Thyroid.* 2015;25(7):716-59.
22. Park S, Jeon MJ, Song E, Oh HS, Kim M, Kwon H, et al. Clinical Features of Early and Late Postoperative Hypothyroidism After Lobectomy. *J Clin Endocrinol Metab.* 2017;102(4):1317-24.
23. Lee DY, Seok J, Jeong WJ, and Ahn SH. Prediction of thyroid hormone supplementation after thyroid lobectomy. *The Journal of surgical research.* 2015;193(1):273-8.
24. Choi H, Lim JA, Ahn HY, Cho SW, Lee KE, Kim KW, et al. Secular trends in the prognostic factors for papillary thyroid cancer. *European journal of endocrinology.* 2014;171(5):667-75.
25. Hoffman K, Lorenzo A, Butt CM, Hammel SC, Henderson BB, Roman SA, et al. Exposure to flame retardant chemicals and occurrence and severity of papillary thyroid cancer: A case-control study. *Environment international.* 2017;107:235-42.
26. Rabes HM, Demidchik EP, Sidorow JD, Lengfelder E, Beimfohr C, Hoelzel D, et al. Pattern of radiation-induced RET and NTRK1 rearrangements in 191 post-chernobyl papillary thyroid carcinomas: biological, phenotypic, and clinical implications. *Clin Cancer Res.* 2000;6(3):1093-103.
27. Jung KW, Won YJ, Kong HJ, and Lee ES. Cancer Statistics in Korea: Incidence, Mortality, Survival, and Prevalence in 2016. *Cancer Res Treat.* 2019;51(2):417-30.
28. Kim J, Gosnell JE, and Roman SA. Geographic influences in the global rise of thyroid cancer. *Nat Rev Endocrinol.* 2020;16(1):17-29.
29. Lima J, Trovisco V, Soares P, Maximo V, Magalhaes J, Salvatore G, et al. BRAF mutations are not a major event in post-Chernobyl childhood thyroid carcinomas. *J Clin Endocrinol Metab.* 2004;89(9):4267-71.
30. Kumagai A, Namba H, Saenko VA, Ashizawa K, Ohtsuru A, Ito M, et al. Low frequency of BRAFT1796A mutations in childhood thyroid carcinomas. *J Clin Endocrinol Metab.* 2004;89(9):4280-4.
31. Penko K, Livezey J, Fenton C, Patel A, Nicholson D, Flora M, et al. BRAF mutations are uncommon in papillary thyroid cancer of young patients. *Thyroid.* 2005;15(4):320-5.
32. Rosenbaum E, Hosler G, Zahurak M, Cohen Y, Sidransky D, and Westra WH. Mutational activation of BRAF is not a major event in sporadic childhood papillary thyroid carcinoma. *Mod Pathol.* 2005;18(7):898-902.
33. Espadinha C, Santos JR, Sobrinho LG, and Bugalho MJ. Expression of iodine metabolism genes in human thyroid tissues: evidence for age and BRAFV600E mutation dependency. *Clin Endocrinol (Oxf).* 2009;70(4):629-35.
34. Sassolas G, Hafdi-Nejjari Z, Ferraro A, Decaussin-Petrucci M, Rousset B, Borson-Chazot F, et al. Oncogenic alterations in papillary thyroid cancers of young patients. *Thyroid.* 2012;22(1):17-26.

35. Ricarte-Filho JC, Li S, Garcia-Rendueles ME, Montero-Conde C, Voza F, Knauf JA, et al. Identification of kinase fusion oncogenes in post-Chernobyl radiation-induced thyroid cancers. *J Clin Invest*. 2013;123(11):4935-44.
36. Givens DJ, Buchmann LO, Agarwal AM, Grimmer JF, and Hunt JP. BRAF V600E does not predict aggressive features of pediatric papillary thyroid carcinoma. *Laryngoscope*. 2014;124(9):E389-93.
37. Henke LE, Perkins SM, Pfeifer JD, Ma C, Chen Y, DeWees T, et al. BRAF V600E mutational status in pediatric thyroid cancer. *Pediatr Blood Cancer*. 2014;61(7):1168-72.
38. Ballester LY, Sarabia SF, Sayeed H, Patel N, Baalwa J, Athanassaki I, et al. Integrating Molecular Testing in the Diagnosis and Management of Children with Thyroid Lesions. *Pediatr Dev Pathol*. 2016;19(2):94-100.
39. Picarsic JL, Buryk MA, Ozolek J, Ranganathan S, Monaco SE, Simons JP, et al. Molecular Characterization of Sporadic Pediatric Thyroid Carcinoma with the DNA/RNA ThyroSeq v2 Next-Generation Sequencing Assay. *Pediatr Dev Pathol*. 2016;19(2):115-22.
40. Mitsutake N, Fukushima T, Matsuse M, Rogounovitch T, Saenko V, Uchino S, et al. BRAF(V600E) mutation is highly prevalent in thyroid carcinomas in the young population in Fukushima: a different oncogenic profile from Chernobyl. *Sci Rep*. 2015;5:16976.
41. Nikita ME, Jiang W, Cheng SM, Hantash FM, McPhaul MJ, Newbury RO, et al. Mutational Analysis in Pediatric Thyroid Cancer and Correlations with Age, Ethnicity, and Clinical Presentation. *Thyroid*. 2016;26(2):227-34.
42. Alzahrani AS, Qasem E, Murugan AK, Al-Hindi HN, AlKhafaji D, Almohanna M, et al. Uncommon TERT Promoter Mutations in Pediatric Thyroid Cancer. *Thyroid*. 2016;26(2):235-41.
43. Prasad ML, Vyas M, Horne MJ, Virk RK, Morotti R, Liu Z, et al. NTRK fusion oncogenes in pediatric papillary thyroid carcinoma in northeast United States. *Cancer*. 2016;122(7):1097-107.
44. Gertz RJ, Nikiforov Y, Rehrauer W, McDaniel L, and Lloyd RV. Mutation in BRAF and Other Members of the MAPK Pathway in Papillary Thyroid Carcinoma in the Pediatric Population. *Arch Pathol Lab Med*. 2016;140(2):134-9.
45. Onder S, Ozturk Sari S, Yegen G, Sormaz IC, Yilmaz I, Poyrazoglu S, et al. Classic Architecture with Multicentricity and Local Recurrence, and Absence of TERT Promoter Mutations are Correlates of BRAF (V600E) Harboring Pediatric Papillary Thyroid Carcinomas. *Endocr Pathol*. 2016;27(2):153-61.
46. Cordioli MI, Moraes L, Carvalheira G, Sisdelli L, Alves MT, Delcelo R, et al. AGK-BRAF gene fusion is a recurrent event in sporadic pediatric thyroid carcinoma. *Cancer Med*. 2016;5(7):1535-41.
47. Alzahrani AS, Murugan AK, Qasem E, Alswailem M, Al-Hindi H, and Shi Y. Single Point Mutations in Pediatric Differentiated Thyroid Cancer. *Thyroid*. 2017;27(2):189-96.
48. Cordioli MI, Moraes L, Bastos AU, Besson P, Alves MT, Delcelo R, et al. Fusion Oncogenes Are the Main Genetic Events Found in Sporadic Papillary Thyroid Carcinomas from Children. *Thyroid*. 2017;27(2):182-8.
49. Oishi N, Kondo T, Nakazawa T, Mochizuki K, Inoue T, Kasai K, et al. Frequent BRAF (V600E) and Absence of TERT Promoter Mutations Characterize Sporadic Pediatric Papillary Thyroid Carcinomas in Japan. *Endocr Pathol*. 2017;28(2):103-11.
50. Hardee S, Prasad ML, Hui P, Dinauer CA, and Morotti RA. Pathologic Characteristics, Natural History, and Prognostic Implications of BRAF(V600E) Mutation in Pediatric Papillary Thyroid Carcinoma. *Pediatr Dev Pathol*. 2017;20(3):206-12.

51. Mostoufi-Moab S, Labourier E, Sullivan L, LiVolsi V, Li Y, Xiao R, et al. Molecular Testing for Oncogenic Gene Alterations in Pediatric Thyroid Lesions. *Thyroid*. 2018;28(1):60-7.
52. Wasserman JD, Sabbaghian N, Fahiminiya S, Chami R, Mete O, Acker M, et al. DICER1 Mutations Are Frequent in Adolescent-Onset Papillary Thyroid Carcinoma. *J Clin Endocrinol Metab*. 2018;103(5):2009-15.
53. Pozdeyev N, Gay LM, Sokol ES, Hartmaier R, Deaver KE, Davis S, et al. Genetic Analysis of 779 Advanced Differentiated and Anaplastic Thyroid Cancers. *Clin Cancer Res*. 2018;24(13):3059-68.
54. Huang M, Yan C, Wei H, Lv Y, and Ling R. Clinicopathological characteristics and prognosis of thyroid cancer in northwest China: A population-based retrospective study of 2490 patients. *Thorac Cancer*. 2018;9(11):1453-60.
55. Sisdelli L, Cordioli M, Vaisman F, Moraes L, Colozza-Gama GA, Alves PAG, Jr., et al. AGK-BRAF is associated with distant metastasis and younger age in pediatric papillary thyroid carcinoma. *Pediatr Blood Cancer*. 2019;66(7):e27707.
56. Pekova B, Sykorova V, Dvorakova S, Vaclavikova E, Moravcova J, Katra R, et al. RET, NTRK, ALK, BRAF and MET fusions in a large cohort of pediatric papillary thyroid carcinomas. *Thyroid*. 2020.
